# Supplementary material for: Anthropogenic transformations of river ecosystems are not always bad for the environment: Multi-taxa analyses of changes in aquatic and terrestrial environments after dredging of a small lowland river
Source: PeerJ. 2021 Sep 29;9:e12224. doi: 10.7717/peerj.12224 (PMC8487244; doi:10.7717/peerj.12224)
Supplement: Supplemental Information 1 [file peerj-09-12224-s001.xlsx]

## Sheet: database
Order	Species	Locality	Number of specimens	data	stage
Trichoptera	Anabolia hybrida	D4/2	1	2009-07-13	after the investment
Trichoptera	Anabolia hybrida	D4/1	1	2009-04-18	after the investment
Trichoptera	Anabolia hybrida	D1/1	1	2009-07-13	after the investment
Trichoptera	Anabolia laevis/furcata	C2/1	1	2008-07-12	before the investment
Trichoptera	Anabolia laevis/furcata	C1/1	1	2009-05-22	after the investment
Trichoptera	Anabolia nervosa	D4/1	2	2008-07-12	before the investment
Trichoptera	Anabolia nervosa	C2/2	4	2008-07-12	before the investment
Trichoptera	Anabolia nervosa	D3/2	4	2008-07-12	before the investment
Trichoptera	Anabolia nervosa	D1/2	4	2008-07-12	before the investment
Trichoptera	Anabolia nervosa	C2/1	13	2008-07-12	before the investment
Trichoptera	Anabolia nervosa	C1/1	17	2008-07-12	before the investment
Trichoptera	Anabolia nervosa	C1/1	11	2008-07-12	before the investment
Trichoptera	Anabolia nervosa	C1/1	3	2008-07-12	before the investment
Trichoptera	Anabolia nervosa	C1/2	9	2008-07-12	before the investment
Trichoptera	Anabolia nervosa	C1/2	31	2008-07-12	before the investment
Trichoptera	Anabolia nervosa	D1/2	2	2009-06-12	after the investment
Trichoptera	Anabolia nervosa	D4/2	1	2009-06-12	after the investment
Trichoptera	Anabolia nervosa	C2/1	2	2009-06-12	after the investment
Trichoptera	Anabolia nervosa	C2/1	1	2009-06-12	after the investment
Trichoptera	Anabolia nervosa	D4/1	8	2009-06-12	after the investment
Trichoptera	Anabolia nervosa	C2/1	7	2009-05-22	after the investment
Trichoptera	Anabolia nervosa	C1/1	1	2009-05-22	after the investment
Trichoptera	Anabolia nervosa	D4/2	2	2009-07-13	after the investment
Trichoptera	Anabolia nervosa	D4/1	19	2009-04-18	after the investment
Trichoptera	Anabolia nervosa	D4/1	1	2009-05-22	after the investment
Trichoptera	Anabolia nervosa	C2/2	18	2009-04-18	after the investment
Trichoptera	Anabolia nervosa	D1/2	2	2009-08-12	after the investment
Trichoptera	Anabolia nervosa	D1/1	4	2009-08-12	after the investment
Trichoptera	Anabolia nervosa	C2/1	9	2009-04-18	after the investment
Trichoptera	Anabolia nervosa	D2/1	1	2009-05-22	after the investment
Trichoptera	Anabolia nervosa	D1/1	2	2009-07-13	after the investment
Trichoptera	Anabolia nervosa	D4/2	2	2009-08-12	after the investment
Trichoptera	Anabolia nervosa	D4/1	1	2009-08-12	after the investment
Trichoptera	Anabolia nervosa	D1/2	9	2009-04-18	after the investment
Trichoptera	Anabolia nervosa	D2/2	1	2009-08-12	after the investment
Trichoptera	Anabolia nervosa	D1/1	1	2009-05-22	after the investment
Trichoptera	Anabolia nervosa	D3/1	5	2009-05-22	after the investment
Trichoptera	Anabolia nervosa	D2/2	2	2009-04-18	after the investment
Trichoptera	Anabolia nervosa	D3/2	7	2009-04-18	after the investment
Trichoptera	Anabolia nervosa	D2/1	3	2009-04-18	after the investment
Trichoptera	Anabolia sp.	C2/1	2	2009-08-12	after the investment
Trichoptera	Anabolia sp.	C2/1	1	2009-07-13	after the investment
Trichoptera	Anabolia sp.	D3/2	1	2009-05-22	after the investment
Trichoptera	Anabolia sp.	D3/2	1	2008-07-12	before the investment
Trichoptera	Anabolia sp.	C2/2	1	2009-05-22	after the investment
Trichoptera	Anabolia-Halesus	C1/2	2	2009-05-22	after the investment
Trichoptera	Athripsodes cinereus	D3/1	1	2009-05-22	after the investment
Trichoptera	Brachycentrus subnubilus	C1/1	6	2008-07-12	before the investment
Trichoptera	Ceraclea dissimilis	C2/2	1	2009-05-22	after the investment
Trichoptera	Goera pilosa	C1/1	1	2009-08-12	after the investment
Trichoptera	Halesus digitatus	C2/1	1	2008-07-12	before the investment
Trichoptera	Halesus digitatus	D2/1	1	2009-06-12	after the investment
Trichoptera	Halesus digitatus	C2/2	2	2009-06-12	after the investment
Trichoptera	Halesus digitatus	C1/1	5	2009-06-12	after the investment
Trichoptera	Halesus digitatus	C1/1	11	2009-05-22	after the investment
Trichoptera	Halesus digitatus	D4/1	2	2009-05-22	after the investment
Trichoptera	Halesus digitatus	C2/2	1	2009-04-18	after the investment
Trichoptera	Halesus digitatus	C2/1	1	2009-04-18	after the investment
Trichoptera	Halesus digitatus	D1/1	1	2009-05-22	after the investment
Trichoptera	Halesus digitatus	D2/2	6	2009-04-18	after the investment
Trichoptera	Halesus digitatus	C1/1	2	2008-07-12	before the investment
Trichoptera	Halesus radiatus	C2/1	1	2008-07-12	before the investment
Trichoptera	Halesus radiatus	C1/1	11	2009-05-22	after the investment
Trichoptera	Halesus radiatus	D2/1	1	2009-05-22	after the investment
Trichoptera	Halesus radiatus	C1/1	3	2009-07-13	after the investment
Trichoptera	Halesus radiatus	D1/2	1	2009-04-18	after the investment
Trichoptera	Halesus radiatus	D1/1	2	2009-05-22	after the investment
Trichoptera	Halesus sp. Juv. (digitatus?)	D4/1	3	2009-04-18	after the investment
Trichoptera	Halesus tesselatus	C1/1	4	2009-05-22	after the investment
Trichoptera	Halesus tesselatus	D4/1	2	2009-05-22	after the investment
Trichoptera	Hydropsyche angustipennis	D3/2	3	2008-07-12	before the investment
Trichoptera	Hydropsyche angustipennis	C2/1	2	2008-07-12	before the investment
Trichoptera	Hydropsyche angustipennis	C1/1	1	2008-07-12	before the investment
Trichoptera	Hydropsyche angustipennis	C1/1	1	2008-07-12	before the investment
Trichoptera	Hydropsyche angustipennis	D4/1	1	2009-05-22	after the investment
Trichoptera	Hydropsyche incognita	D1/1	1	2009-07-13	after the investment
Trichoptera	Hydropsyche pellucidula	C1/1	22	2008-07-12	before the investment
Trichoptera	Hydropsyche pellucidula	C2/1	2	2009-05-22	after the investment
Trichoptera	Hydropsyche pellucidula	C1/1	2	2009-05-22	after the investment
Trichoptera	Hydropsyche pellucidula	D4/1	2	2009-04-18	after the investment
Trichoptera	Hydropsyche pellucidula	D1/1	2	2009-08-12	after the investment
Trichoptera	Hydropsyche pellucidula	C1/1	16	2009-07-13	after the investment
Trichoptera	Hydropsyche pellucidula	D1/1	2	2009-08-12	after the investment
Trichoptera	Hydropsyche pellucidula	D1/1	3	2009-05-22	after the investment
Trichoptera	Hydropsyche pellucidula	C1/1	4	2008-07-12	before the investment
Trichoptera	Hydropsyche siltalai	C1/1	2	2009-05-22	after the investment
Trichoptera	Hydropsyche sp. (juv. Angustipennis?)	C1/1	1	2008-07-12	before the investment
Trichoptera	Hydroptila sp.	D1/1	1	2009-08-12	after the investment
Trichoptera	Lepidostoma hirtum	C1/1	1	2008-07-12	before the investment
Trichoptera	Limnephilus flavicornis	C2/2	1	2009-04-18	after the investment
Trichoptera	Limnephilus lunatus	C1/1	2	2008-07-12	before the investment
Trichoptera	Limnephilus lunatus	C1/2	1	2009-06-12	after the investment
Trichoptera	Limnephilus lunatus	C1/2	1	2009-05-22	after the investment
Trichoptera	Limnephilus lunatus	C2/2	1	2009-04-18	after the investment
Trichoptera	Limnephilus lunatus	D1/1	1	2009-05-22	after the investment
Trichoptera	Limnephilus lunatus	D3/2	1	2009-04-18	after the investment
Trichoptera	Limnephilus rhombicus	C1/1	1	2009-06-12	after the investment
Trichoptera	Limnephilus sp. Flavicornis-politus	C1/2	1	2009-05-22	after the investment
Trichoptera	Limnephilus sp. Juv. (lunatus)	D2/2	1	2009-05-22	after the investment
Trichoptera	Mystacides azurea	C2/1	1	2008-07-12	before the investment
Trichoptera	Mystacides azurea	C1/1	2	2009-05-22	after the investment
Trichoptera	Mystacides azurea	D4/1	1	2009-04-18	after the investment
Trichoptera	Mystacides azurea	D4/1	1	2009-05-22	after the investment
Trichoptera	Mystacides azurea	D1/2	1	2009-08-12	after the investment
Trichoptera	Mystacides azurea	D2/1	8	2009-05-22	after the investment
Trichoptera	Mystacides azurea	D1/1	1	2009-07-13	after the investment
Trichoptera	Mystacides azurea	D1/1	1	2009-08-12	after the investment
Trichoptera	Mystacides azurea	D1/2	1	2009-07-13	after the investment
Trichoptera	Mystacides azurea	D1/2	2	2009-05-22	after the investment
Trichoptera	Mystacides azurea	D3/2	3	2009-05-22	after the investment
Trichoptera	Neureclipsis bimaculata	D3/2	2	2008-07-12	before the investment
Trichoptera	Neureclipsis bimaculata	C2/1	1	2009-06-12	after the investment
Trichoptera	Neureclipsis bimaculata	D4/1	1	2009-06-12	after the investment
Trichoptera	Neureclipsis bimaculata	C2/2	1	2009-06-12	after the investment
Trichoptera	Neureclipsis bimaculata	C2/1	1	2009-05-22	after the investment
Trichoptera	Neureclipsis bimaculata	D4/2	2	2009-07-13	after the investment
Trichoptera	Neureclipsis bimaculata	D4/1	5	2009-04-18	after the investment
Trichoptera	Neureclipsis bimaculata	D4/1	2	2009-05-22	after the investment
Trichoptera	Neureclipsis bimaculata	D3/1	4	2009-07-13	after the investment
Trichoptera	Neureclipsis bimaculata	C2/2	5	2009-04-18	after the investment
Trichoptera	Neureclipsis bimaculata	C2/1	1	2009-04-18	after the investment
Trichoptera	Neureclipsis bimaculata	C1/1	3	2009-07-13	after the investment
Trichoptera	Neureclipsis bimaculata	C2/1	2	2009-07-13	after the investment
Trichoptera	Neureclipsis bimaculata	D2/2	1	2009-08-12	after the investment
Trichoptera	Neureclipsis bimaculata	D3/2	1	2008-07-12	before the investment
Trichoptera	Oecetis furva	D3/2	1	2009-07-13	after the investment
Trichoptera	Oecetis lacustris	D1/1	1	2009-08-12	after the investment
Trichoptera	Oecetis testacea	D1/1	1	2009-05-22	after the investment
Trichoptera	Oecetis testacea	C2/2	1	2009-05-22	after the investment
Trichoptera	Polycentropus irroratus	D2/2	1	2009-04-18	after the investment
Trichoptera	Potamophylax latipennis	C1/1	6	2009-06-12	after the investment
Trichoptera	Potamophylax latipennis	C1/1	2	2009-05-22	after the investment
Trichoptera	Potamophylax latipennis	C1/1	3	2009-07-13	after the investment
Trichoptera	Potamophylax latipennis	C1/1	6	2008-07-12	before the investment
Trichoptera	Potamophylax rotundipennis	C1/1	6	2009-06-12	after the investment
Trichoptera	Potamophylax rotundipennis	C1/1	2	2009-05-22	after the investment
Trichoptera	Potamophylax rotundipennis	C1/1	2	2008-07-12	before the investment
Trichoptera	Triaenodes bicolor	D1/2	1	2009-07-13	after the investment
Trichoptera	Triaenodes bicolor	D4/1	1	2009-07-13	after the investment
Trichoptera	Triaenodes bicolor	D2/2	1	2009-07-13	after the investment
Trichoptera	Triaenodes bicolor	D3/2	3	2008-07-12	before the investment
Trichoptera	Ylodes-Triaenodes juv.	C2/2	1	2009-08-12	after the investment
Trichoptera	Ylodes-Triaenodes juv.	D3/2	1	2009-07-13	after the investment
Coleoptera	Acilius canaliculatus	C2/2	1	2009-08-12	after the investment
Coleoptera	Acilius sulcatus	C2/2	1	2009-07-13	after the investment
Coleoptera	Agabus bipustulatus	C1/2	1	2009-08-12	after the investment
Coleoptera	Agabus bipustulatus	C1/2	1	2008-07-12	before the investment
Coleoptera	Agabus sp.	D3/2	3	2009-07-13	after the investment
Coleoptera	Agabus sp.	D4/2	1	2009-08-12	after the investment
Coleoptera	Agabus sp.	D2/2	3	2009-07-13	after the investment
Coleoptera	Agabus sp.	D4/2	2	2009-07-13	after the investment
Coleoptera	Agabus sp.	C2/2	1	2009-07-13	after the investment
Coleoptera	Agabus sp.	D1/2	1	2009-08-12	after the investment
Coleoptera	Agabus sp.	D2/2	1	2009-08-12	after the investment
Coleoptera	Agabus sp.	D4/2	1	2008-07-12	before the investment
Coleoptera	Agabus undulatus	C2/2	1	2009-08-12	after the investment
Coleoptera	Anacaena limbata	C2/2	1	2009-08-12	after the investment
Coleoptera	Anacaena limbata	C2/2	1	2009-04-18	after the investment
Coleoptera	Anacaena limbata	D2/2	1	2009-07-13	after the investment
Coleoptera	Anacaena limbata	C1/2	1	2009-07-13	after the investment
Coleoptera	Anacaena limbata	D2/2	2	2009-08-12	after the investment
Coleoptera	Anacaena lutescens	C1/2	2	2009-05-22	after the investment
Coleoptera	Cercyon bifenestratus	D2/1	1	2008-07-12	before the investment
Coleoptera	Cercyon sp.	D3/2	1	2009-08-12	after the investment
Coleoptera	Chrysomelidae	D2/2	5	2009-07-13	after the investment
Coleoptera	Coelambus imperssopunctataus	C1/2	1	2009-07-13	after the investment
Coleoptera	Colymbetes fuscus	C1/2	1	2008-07-12	before the investment
Coleoptera	Colymbetes sp.	D3/1	2	2008-07-12	before the investment
Coleoptera	Cymbiodyta marginella	D1/2	1	2009-08-12	after the investment
Coleoptera	Dytiscus dimidiatus	D3/1	1	2009-08-12	after the investment
Coleoptera	Dytiscus sp.	C1/2	1	2009-07-13	after the investment
Coleoptera	Elmis aenea	C1/1	9	2008-07-12	before the investment
Coleoptera	Elmis aenea	C1/1	14	2008-07-12	before the investment
Coleoptera	Enochrus melanocephalus	C1/2	1	2009-05-22	after the investment
Coleoptera	Graptodytes pictus	C2/2	1	2009-08-12	after the investment
Coleoptera	Graptodytes pictus	D3/2	1	2009-08-12	after the investment
Coleoptera	Graptodytes pictus	D4/1	1	2009-08-12	after the investment
Coleoptera	Graptodytes pictus	C2/2	1	2009-05-22	after the investment
Coleoptera	Gyrrinus natator	D1/2	1	2008-07-12	before the investment
Coleoptera	Gyrrinus substriatus	D4/2	2	2008-07-12	before the investment
Coleoptera	Gyrrinus substriatus	C1/2	1	2008-07-12	before the investment
Coleoptera	Haliplus flavicollis	D4/1	1	2008-07-12	before the investment
Coleoptera	Haliplus flavicollis	D4/1	2	2009-07-13	after the investment
Coleoptera	Haliplus flavicollis	D3/2	5	2009-07-13	after the investment
Coleoptera	Haliplus flavicollis	D2/2	1	2009-08-12	after the investment
Coleoptera	Haliplus flavicollis	C2/2	2	2009-06-12	after the investment
Coleoptera	Haliplus fluviatilis	C2/2	1	2009-08-12	after the investment
Coleoptera	Haliplus fluviatilis	D1/1	1	2008-07-12	before the investment
Coleoptera	Haliplus fluviatilis	D4/1	3	2009-07-13	after the investment
Coleoptera	Haliplus fluviatilis	C2/2	1	2009-07-13	after the investment
Coleoptera	Haliplus fluviatilis	D3/2	3	2009-08-12	after the investment
Coleoptera	Haliplus fluviatilis	D4/1	3	2009-08-12	after the investment
Coleoptera	Haliplus fluviatilis	D3/2	4	2009-07-13	after the investment
Coleoptera	Haliplus fluviatilis	C2/2	3	2009-05-22	after the investment
Coleoptera	Haliplus fluviatilis	D2/2	7	2009-07-13	after the investment
Coleoptera	Haliplus fluviatilis	D1/2	3	2009-07-13	after the investment
Coleoptera	Haliplus fluviatilis	D3/2	1	2009-06-12	after the investment
Coleoptera	Haliplus fluviatilis	D1/2	1	2009-08-12	after the investment
Coleoptera	Haliplus fluviatilis	D4/1	2	2009-06-12	after the investment
Coleoptera	Haliplus fluviatilis	D2/2	1	2009-06-12	after the investment
Coleoptera	Haliplus fluviatilis	D1/1	1	2009-08-12	after the investment
Coleoptera	Haliplus fluviatilis	D2/2	2	2009-08-12	after the investment
Coleoptera	Haliplus fluviatilis	D2/1	1	2008-07-12	before the investment
Coleoptera	Haliplus fluviatilis	C1/2	15	2008-07-12	before the investment
Coleoptera	Haliplus fluviatilis	C1/2	1	2008-07-12	before the investment
Coleoptera	Haliplus heydeni	C2/2	1	2009-08-12	after the investment
Coleoptera	Haliplus heydeni	D3/2	4	2009-08-12	after the investment
Coleoptera	Haliplus immaculatus	D3/1	1	2009-08-12	after the investment
Coleoptera	Haliplus immaculatus	D4/1	8	2009-07-13	after the investment
Coleoptera	Haliplus immaculatus	C2/2	1	2009-07-13	after the investment
Coleoptera	Haliplus immaculatus	D3/2	2	2009-08-12	after the investment
Coleoptera	Haliplus immaculatus	D3/2	8	2009-07-13	after the investment
Coleoptera	Haliplus immaculatus	D2/2	7	2009-07-13	after the investment
Coleoptera	Haliplus immaculatus	D3/2	2	2009-06-12	after the investment
Coleoptera	Haliplus immaculatus	D1/1	1	2009-08-12	after the investment
Coleoptera	Haliplus immaculatus	D2/2	8	2009-08-12	after the investment
Coleoptera	Haliplus immaculatus	C2/2	2	2009-06-12	after the investment
Coleoptera	Haliplus ruficollis	C2/2	3	2009-08-12	after the investment
Coleoptera	Haliplus ruficollis	D4/1	1	2009-07-13	after the investment
Coleoptera	Haliplus ruficollis	D4/1	2	2009-08-12	after the investment
Coleoptera	Haliplus ruficollis	C2/2	1	2009-05-22	after the investment
Coleoptera	Haliplus ruficollis	D2/2	3	2009-07-13	after the investment
Coleoptera	Haliplus ruficollis	D3/1	1	2008-07-12	before the investment
Coleoptera	Haliplus ruficollis	D1/2	1	2009-08-12	after the investment
Coleoptera	Haliplus ruficollis	D2/2	1	2009-06-12	after the investment
Coleoptera	Haliplus ruficollis	D2/2	1	2009-08-12	after the investment
Coleoptera	Haliplus ruficollis	C2/2	1	2009-06-12	after the investment
Coleoptera	Haliplus ruficollis	D4/2	1	2008-07-12	before the investment
Coleoptera	Helochares lividus	D1/1	1	2008-07-12	before the investment
Coleoptera	Helophorus dorsalis	D1/1	1	2008-07-12	before the investment
Coleoptera	Helophorus dorsalis	C2/2	1	2009-04-18	after the investment
Coleoptera	Helophorus griseus	D4/1	1	2009-06-12	after the investment
Coleoptera	Helophorus griseus	C1/2	1	2008-07-12	before the investment
Coleoptera	Helophorus minutus	D2/2	1	2009-08-12	after the investment
Coleoptera	Helophorus minutus	D2/1	1	2008-07-12	before the investment
Coleoptera	Hydraena gracilis	C1/1	1	2008-07-12	before the investment
Coleoptera	Hydraena palusrtris	D2/2	1	2009-08-12	after the investment
Coleoptera	Hydraena riparia	C1/1	1	2008-07-12	before the investment
Coleoptera	Hydraena riparia	D1/1	1	2008-07-12	before the investment
Coleoptera	Hydraena riparia	C2/2	1	2009-07-13	after the investment
Coleoptera	Hydraena riparia	D3/2	2	2009-08-12	after the investment
Coleoptera	Hydraena riparia	D3/2	1	2009-07-13	after the investment
Coleoptera	Hydraena riparia	D1/2	2	2009-07-13	after the investment
Coleoptera	Hydraena riparia	D3/1	1	2008-07-12	before the investment
Coleoptera	Hydraena riparia	D4/2	1	2009-08-12	after the investment
Coleoptera	Hydraena riparia	C1/2	1	2009-08-12	after the investment
Coleoptera	Hydraena riparia	D1/2	3	2009-08-12	after the investment
Coleoptera	Hydraena riparia	D1/1	1	2009-08-12	after the investment
Coleoptera	Hydraena riparia	D2/2	3	2009-08-12	after the investment
Coleoptera	Hydraena riparia	C1/1	3	2009-08-12	after the investment
Coleoptera	Hydraena riparia	C1/1	4	2008-07-12	before the investment
Coleoptera	Hydraticus seminiger	C1/1	1	2008-07-12	before the investment
Coleoptera	Hydrobius fuscipes	C1/2	1	2009-05-22	after the investment
Coleoptera	Hydrobius fuscipes	C1/2	1	2008-07-12	before the investment
Coleoptera	Hydrochus carinatus	D1/2	1	2009-08-12	after the investment
Coleoptera	Hydroporus angustatus	C1/2	1	2009-08-12	after the investment
Coleoptera	Hydroporus angustatus	D1/2	1	2009-08-12	after the investment
Coleoptera	Hydroporus dorsalis	C1/2	1	2008-07-12	before the investment
Coleoptera	Hydroporus ferrugineus	C1/2	1	2008-07-12	before the investment
Coleoptera	Hydroporus palustris	C2/2	2	2009-08-12	after the investment
Coleoptera	Hydroporus palustris	D1/2	1	2009-05-22	after the investment
Coleoptera	Hydroporus palustris	D3/2	1	2009-04-18	after the investment
Coleoptera	Hydroporus planus	D4/2	1	2008-07-12	before the investment
Coleoptera	Hygrotus inaequalis	C1/2	1	2009-06-12	after the investment
Coleoptera	Hygrotus inaequalis	D4/1	2	2009-08-12	after the investment
Coleoptera	Hygrotus inaequalis	D2/2	1	2009-07-13	after the investment
Coleoptera	Hygrotus inaequalis	D2/2	1	2009-06-12	after the investment
Coleoptera	Hyphydrus ovatus	C2/2	7	2009-08-12	after the investment
Coleoptera	Hyphydrus ovatus	D4/1	32	2009-07-13	after the investment
Coleoptera	Hyphydrus ovatus	C2/2	1	2009-07-13	after the investment
Coleoptera	Hyphydrus ovatus	D3/2	1	2009-08-12	after the investment
Coleoptera	Hyphydrus ovatus	D4/1	1	2009-08-12	after the investment
Coleoptera	Hyphydrus ovatus	D3/2	1	2009-07-13	after the investment
Coleoptera	Hyphydrus ovatus	C2/2	1	2009-05-22	after the investment
Coleoptera	Hyphydrus ovatus	D3/2	3	2009-06-12	after the investment
Coleoptera	Hyphydrus ovatus	C1/2	1	2009-08-12	after the investment
Coleoptera	Hyphydrus ovatus	D4/1	3	2009-06-12	after the investment
Coleoptera	Hyphydrus ovatus	D2/2	2	2009-08-12	after the investment
Coleoptera	Ilybius ater	C1/2	1	2009-06-12	after the investment
Coleoptera	Ilybius ater	C1/2	1	2008-07-12	before the investment
Coleoptera	Ilybius fenestratus	C2/2	1	2009-08-12	after the investment
Coleoptera	Ilybius fenestratus	C1/2	1	2009-08-12	after the investment
Coleoptera	Ilybius fenestratus	D4/1	2	2009-06-12	after the investment
Coleoptera	Ilybius fuliginosus	C1/2	4	2009-06-12	after the investment
Coleoptera	Ilybius fuliginosus	D3/2	2	2009-07-13	after the investment
Coleoptera	Ilybius fuliginosus	C1/2	9	2009-07-13	after the investment
Coleoptera	Ilybius fuliginosus	D2/2	1	2009-08-12	after the investment
Coleoptera	Ilybius guttiger	D1/2	1	2009-05-22	after the investment
Coleoptera	Ilybius obscurus	C1/2	1	2009-05-22	after the investment
Coleoptera	Ilybius obscurus	C1/2	1	2009-07-13	after the investment
Coleoptera	Ilybius obscurus	C1/2	1	2008-07-12	before the investment
Coleoptera	Ilybius sp.	D1/2	2	2009-08-12	after the investment
Coleoptera	Ilybius sp.	D1/1	1	2009-08-12	after the investment
Coleoptera	Ilybius sp.	D2/2	1	2009-08-12	after the investment
Coleoptera	Ilybius subaeneus	C1/2	8	2009-05-22	after the investment
Coleoptera	Ilybius subaeneus	C1/2	3	2009-06-12	after the investment
Coleoptera	Ilybius subaeneus	C1/2	2	2009-07-13	after the investment
Coleoptera	Laccobius hyalinus	D4/1	1	2008-07-12	before the investment
Coleoptera	Laccobius minutus	C2/2	1	2009-08-12	after the investment
Coleoptera	Laccobius minutus	D3/2	3	2009-08-12	after the investment
Coleoptera	Laccobius minutus	D4/1	1	2009-08-12	after the investment
Coleoptera	Laccobius minutus	D3/2	1	2009-07-13	after the investment
Coleoptera	Laccobius minutus	D1/2	2	2009-04-18	after the investment
Coleoptera	Laccobius minutus	C2/2	1	2009-05-22	after the investment
Coleoptera	Laccobius minutus	D2/2	1	2009-07-13	after the investment
Coleoptera	Laccobius minutus	D1/2	2	2009-07-13	after the investment
Coleoptera	Laccobius minutus	D3/2	2	2009-05-22	after the investment
Coleoptera	Laccobius minutus	D2/2	20	2009-08-12	after the investment
Coleoptera	Laccobius striatulus	D3/2	1	2009-08-12	after the investment
Coleoptera	Laccophilus hyalinus	D3/2	1	2008-07-12	before the investment
Coleoptera	Laccophilus hyalinus	C2/2	8	2009-08-12	after the investment
Coleoptera	Laccophilus hyalinus	D4/1	1	2009-07-13	after the investment
Coleoptera	Laccophilus hyalinus	D3/2	6	2009-08-12	after the investment
Coleoptera	Laccophilus hyalinus	D4/1	2	2009-08-12	after the investment
Coleoptera	Laccophilus hyalinus	D1/2	1	2009-08-12	after the investment
Coleoptera	Laccophilus hyalinus	C2/2	3	2009-06-12	after the investment
Coleoptera	Laccophilus minutus	D1/1	1	2008-07-12	before the investment
Coleoptera	Laccophilus minutus	D4/1	1	2009-07-13	after the investment
Coleoptera	Laccophilus minutus	D3/2	13	2009-08-12	after the investment
Coleoptera	Laccophilus minutus	D3/2	3	2009-07-13	after the investment
Coleoptera	Laccophilus minutus	D2/2	2	2009-07-13	after the investment
Coleoptera	Laccophilus minutus	D3/1	2	2008-07-12	before the investment
Coleoptera	Laccophilus minutus	D1/2	1	2009-08-12	after the investment
Coleoptera	Laccophilus minutus	D2/2	2	2009-08-12	after the investment
Coleoptera	Limnus volcmari	C1/1	2	2008-07-12	before the investment
Coleoptera	Noterus clavicornis	C2/2	1	2009-07-13	after the investment
Coleoptera	Noterus clavicornis	C1/2	1	2009-07-13	after the investment
Coleoptera	Noterus clavicornis	D3/2	4	2009-06-12	after the investment
Coleoptera	Noterus clavicornis	D4/1	1	2009-06-12	after the investment
Coleoptera	Noterus clavicornis	D2/2	1	2009-06-12	after the investment
Coleoptera	Noterus crassicornis	C1/2	1	2009-05-22	after the investment
Coleoptera	Noterus crassicornis	C2/2	2	2009-07-13	after the investment
Coleoptera	Noterus crassicornis	C2/2	1	2009-05-22	after the investment
Coleoptera	Noterus crassicornis	C1/2	1	2009-08-12	after the investment
Coleoptera	Noterus crassicornis	D2/2	1	2009-06-12	after the investment
Coleoptera	Noterus crassicornis	C2/2	4	2009-06-12	after the investment
Coleoptera	Ochthebius bicolon	D1/2	1	2009-07-13	after the investment
Coleoptera	Hyphydrus ovatus	DS3	27	2009-07-13	fish ponds
Coleoptera	Rhantus exoletus	DS3	2	2009-07-13	fish ponds
Coleoptera	Laccophilus hyalinus	DS3	1	2009-07-13	fish ponds
Coleoptera	Hygrotus inaequalis	DS3	1	2009-07-13	fish ponds
Coleoptera	Haliplus flavicollis	DS3	4	2009-07-13	fish ponds
Coleoptera	Haliplus fulvus	DS3	1	2009-07-13	fish ponds
Coleoptera	Haliplus immaculatus	DS3	2	2009-07-13	fish ponds
Coleoptera	Hyphydrus ovatus	DS1	25	2009-07-13	fish ponds
Coleoptera	Enochrus testaceus	DS1	1	2009-07-13	fish ponds
Coleoptera	Helophorus griseus	DS1	1	2009-07-13	fish ponds
Coleoptera	Haliplus flavicollis	DS1	5	2009-07-13	fish ponds
Coleoptera	Haliplus immaculatus	DS1	32	2009-07-13	fish ponds
Coleoptera	Haliplus fluviatilis	DS1	2	2009-07-13	fish ponds
Coleoptera	Haliplus ruficollis	DS1	1	2009-07-13	fish ponds
Coleoptera	Haliplus sp.	DS1	1	2009-07-13	fish ponds
Coleoptera	Agabus sp.	DS1	1	2009-07-13	fish ponds
Coleoptera	Hyphydrus ovatus	DS2	5	2009-07-13	fish ponds
Coleoptera	Noterus clavicornis	DS2	2	2009-07-13	fish ponds
Coleoptera	Noterus crassicornis	DS2	3	2009-07-13	fish ponds
Coleoptera	Coelambus imperssopunctataus	DS2	1	2009-07-13	fish ponds
Coleoptera	Helochares obscurus	DS2	1	2009-07-13	fish ponds
Coleoptera	Enochrus testaceus	DS2	1	2009-07-13	fish ponds
Coleoptera	Ilybius sp.	DS2	1	2009-07-13	fish ponds
Coleoptera	Agabus sp.	DS2	1	2009-07-13	fish ponds
Coleoptera	Haliplus immaculatus	DS2	40	2009-07-13	fish ponds
Coleoptera	Haliplus fluviatilis	DS2	4	2009-07-13	fish ponds
Coleoptera	Hyphydrus ovatus	DS4	5	2009-07-13	fish ponds
Coleoptera	Haliplus flavicollis	DS4	3	2009-07-13	fish ponds
Coleoptera	Haliplus immaculatus	DS4	4	2009-07-13	fish ponds
Coleoptera	Haliplus fluviatilis	DS4	2	2009-07-13	fish ponds
Coleoptera	Ilybius similis	MS	1	2009-07-13	fish ponds
Coleoptera	Agabus undulatus	MS	1	2009-07-13	fish ponds
Coleoptera	Helochares obscurus	MS	1	2009-07-13	fish ponds
Coleoptera	Helophorus nanus	MS	1	2009-07-13	fish ponds
Coleoptera	Enochrus sp.	MS	1	2009-07-13	fish ponds
Coleoptera	Ochthebius dilatatus	D1/1	1	2008-07-12	before the investment
Coleoptera	Oulimnius tuberculatus	C2/1	8	2008-07-12	before the investment
Coleoptera	Oulimnius tuberculatus	C1/1	3	2008-07-12	before the investment
Coleoptera	Oulimnius tuberculatus	C2/2	1	2009-08-12	after the investment
Coleoptera	Oulimnius tuberculatus	D4/1	1	2009-07-13	after the investment
Coleoptera	Oulimnius tuberculatus	D3/2	2	2009-08-12	after the investment
Coleoptera	Oulimnius tuberculatus	D2/2	2	2009-07-13	after the investment
Coleoptera	Oulimnius tuberculatus	C1/2	2	2009-08-12	after the investment
Coleoptera	Oulimnius tuberculatus	D2/2	1	2009-06-12	after the investment
Coleoptera	Oulimnius tuberculatus	D1/1	3	2009-08-12	after the investment
Coleoptera	Oulimnius tuberculatus	D2/2	1	2009-08-12	after the investment
Coleoptera	Oulimnius tuberculatus	C1/1	1	2009-08-12	after the investment
Coleoptera	Oulimnius tuberculatus	C1/1	4	2008-07-12	before the investment
Coleoptera	Polyphaga larv. non det.	C1/2	1	2008-07-12	before the investment
Coleoptera	Rhantus exoletus	C1/2	1	2009-06-12	after the investment
Coleoptera	Rhantus pulverosus	C1/2	1	2009-05-22	after the investment
Coleoptera		D2/1	0	2009-07-13	after the investment
Mollusca	Bithynia tentaculata	C1/1	1	2009-05-22	after the investment
Mollusca	Potamopyrgus antipodarum	C1/1	1	2009-05-22	after the investment
Mollusca	Sphaerium corneum	C1/1	1	2009-05-22	after the investment
Mollusca	Pisidium supinum	C1/1	1	2009-05-22	after the investment
Mollusca	Pisidium subtruncatum	C1/1	1	2009-05-22	after the investment
Mollusca	Unio crassus	C1/1	2	2009-05-22	after the investment
Mollusca	Theodoxus fluviatilis	C1/1	2	2009-06-12	after the investment
Mollusca	Potamopyrgus antipodarum	C1/1	1	2009-06-12	after the investment
Mollusca	Bithynia tentaculata	C1/1	1	2009-06-12	after the investment
Mollusca	Pisidium amnicum	C1/1	1	2009-06-12	after the investment
Mollusca	Unio crassus	C1/1	3	2009-06-12	after the investment
Mollusca	Sphaerium corneum	C1/1	6	2009-06-12	after the investment
Mollusca	Theodoxus fluviatilis	C1/1	3	2009-07-13	after the investment
Mollusca	Bithynia tentaculata	C1/1	3	2009-07-13	after the investment
Mollusca	Pisidium amnicum	C1/1	3	2009-07-13	after the investment
Mollusca	Pisidium supinum	C1/1	1	2009-07-13	after the investment
Mollusca	Unio crassus	C1/1	3	2009-07-13	after the investment
Mollusca	Theodoxus fluviatilis	C1/1	5	2009-08-12	after the investment
Mollusca	Potamopyrgus antipodarum	C1/1	3	2009-08-12	after the investment
Mollusca	Ancylus fluviatilis	C1/1	1	2009-08-12	after the investment
Mollusca	Sphaerium corneum	C1/1	1	2009-08-12	after the investment
Mollusca	Pisidium amnicum	C1/1	1	2009-08-12	after the investment
Mollusca	Pisidium ponderosum	C1/1	1	2009-08-12	after the investment
Mollusca	Unio crassus	C1/1	1	2009-08-12	after the investment
Mollusca	Bithynia tentaculata	C1/2	2	2009-05-22	after the investment
Mollusca	Anisus vortex	C1/2	3	2009-05-22	after the investment
Mollusca	Succinea elegans	C1/2	1	2009-05-22	after the investment
Mollusca	Bithynia tentaculata	C1/2	7	2009-06-12	after the investment
Mollusca	Anisus vortex	C1/2	2	2009-06-12	after the investment
Mollusca	Sphaerium corneum	C1/2	1	2009-06-12	after the investment
Mollusca	Anisus vortex	C1/2	23	2009-08-12	after the investment
Mollusca	Lymnaea stagnalis	C1/2	4	2009-08-12	after the investment
Mollusca	Succinea elegans	C1/2	3	2009-08-12	after the investment
Mollusca	Lymnaea stagnalis	D1/1	5	2009-06-12	after the investment
Mollusca	Unio tumidus	D1/1	1	2009-06-12	after the investment
Mollusca	Bithynia tentaculata	D1/1	1	2009-06-12	after the investment
Mollusca	Viviparus viviparus	D1/1	1	2009-04-18	after the investment
Mollusca	Pisidium supinum	D1/1	6	2009-04-18	after the investment
Mollusca	Pisidium subtruncatum	D1/1	3	2009-04-18	after the investment
Mollusca	Pisidium amnicum	D1/1	3	2009-04-18	after the investment
Mollusca	Pisidium ponderosum	D1/1	5	2009-04-18	after the investment
Mollusca	Unio crassus	C1/1	1	2009-04-18	after the investment
Mollusca	Planorbarius corneus	D1/1	1	2009-05-22	after the investment
Mollusca	Pisidium amnicum	D1/1	2	2009-05-22	after the investment
Mollusca	Pisidium subtruncatum	D1/1	1	2009-05-22	after the investment
Mollusca	Unio crassus	D1/1	1	2009-05-22	after the investment
Mollusca	Viviparus viviparus	D1/1	3	2008-07-12	before the investment
Mollusca	Lymnaea stagnalis	D1/1	1	2008-07-12	before the investment
Mollusca	Pisidium henslowanum	D1/1	1	2009-07-13	after the investment
Mollusca	Planorbarius corneus	D1/2	2	2009-06-12	after the investment
Mollusca	Unio crassus	D1/1	1	2009-06-12	after the investment
Mollusca	Radix balthica	D1/2	2	2009-07-13	after the investment
Mollusca	Lymnaea stagnalis	D1/2	2	2009-07-13	after the investment
Mollusca	Galba truncatula	D1/2	1	2009-07-13	after the investment
Mollusca	Planorbarius corneus	D1/2	1	2009-07-13	after the investment
Mollusca	Succinea elegans	D1/2	3	2009-07-13	after the investment
Mollusca	Physa fontinalis	D1/2	1	2009-08-12	after the investment
Mollusca	Stagnicola sp., juv.	D1/2	1	2009-08-12	after the investment
Mollusca	Bithynia tentaculata	D1/2	2	2009-08-12	after the investment
Mollusca	Planorbis planorbis	D1/2	7	2009-08-12	after the investment
Mollusca	Radix auricularia	D1/2	4	2009-08-12	after the investment
Mollusca	Radix balthica	D1/2	1	2009-08-12	after the investment
Mollusca	Lymnaea stagnalis	D1/2	8	2009-08-12	after the investment
Mollusca	Anisus vortex	D1/2	8	2009-08-12	after the investment
Mollusca	Sphaerium corneum	D2/1	1	2009-04-18	after the investment
Mollusca	Pisidium amnicum	D2/1	1	2009-05-22	after the investment
Mollusca	Pisidium amnicum	D2/1	1	2009-06-12	after the investment
Mollusca	Pisidium subtruncatum	D2/1	3	2009-06-12	after the investment
Mollusca	Unio tumidus	D2/1	3	2009-06-12	after the investment
Mollusca	Sphaerium corneum	D2/1	1	2009-06-12	after the investment
Mollusca	Pisidium amnicum	D2/1	1	2009-07-13	after the investment
Mollusca	Unio tumidus	D2/1	2	2009-07-13	after the investment
Mollusca	Bithynia tentaculata	D2/1	1	2009-08-12	after the investment
Mollusca	Gyraulus albus	D2/1	1	2009-08-12	after the investment
Mollusca	Unio tumidus	D2/1	3	2009-08-12	after the investment
Mollusca	Viviparus viviparus	D2/2	1	2009-05-22	after the investment
Mollusca	Unio tumidus	D2/2	1	2009-05-22	after the investment
Mollusca	Pisidium ponderosum	D2/2	1	2009-05-22	after the investment
Mollusca	Galba truncatula	D2/2	6	2009-06-12	after the investment
Mollusca	Galba truncatula	D2/2	11	2009-07-13	after the investment
Mollusca	Physa fontinalis	D2/2	1	2009-07-13	after the investment
Mollusca	Stagnicola sp., juv.	D2/2	1	2009-07-13	after the investment
Mollusca	Planorbis planorbis	D2/2	1	2009-07-13	after the investment
Mollusca	Pisidium amnicum	D2/2	1	2009-07-13	after the investment
Mollusca	Succinea elegans	D2/2	11	2009-07-13	after the investment
Mollusca	Helicidae	D2/2	2	2009-07-13	after the investment
Mollusca	Lymnaea stagnalis	D2/2	8	2009-08-12	after the investment
Mollusca	Gyraulus albus	D2/2	2	2009-08-12	after the investment
Mollusca	Anisus vortex	D2/2	2	2009-08-12	after the investment
Mollusca	Pisidium supinum	D2/2	2	2009-08-12	after the investment
Mollusca	Pisidium amnicum	D2/2	3	2009-08-12	after the investment
Mollusca	Potamopyrgus antipodarum	D2/2	4	2009-08-12	after the investment
Mollusca	Radix sp., juv.	D2/2	1	2009-08-12	after the investment
Mollusca	Viviparus viviparus	D3/1		2009-04-18	after the investment
Mollusca	Unio crassus	D3/1	2	2009-04-18	after the investment
Mollusca	Viviparus viviparus	D3/1	1	2009-05-22	after the investment
Mollusca	Sphaerium corneum	D3/1	1	2009-05-22	after the investment
Mollusca	Pisidium amnicum	D3/1	4	2009-05-22	after the investment
Mollusca	Pisidium subtruncatum	D3/1	2	2009-05-22	after the investment
Mollusca	Pisidium casertanum	D3/1	1	2009-05-22	after the investment
Mollusca	Unio crassus	D3/1	5	2009-05-22	after the investment
Mollusca	Theodoxus fluviatilis	D3/1	1	2009-07-13	after the investment
Mollusca	Segmentina nitida	D3/1	1	2009-07-13	after the investment
Mollusca	Planorbis planorbis	D3/1	1	2009-07-13	after the investment
Mollusca	Radix balthica	D3/1	1	2009-07-13	after the investment
Mollusca	Pisidium amnicum	D3/1	4	2009-07-13	after the investment
Mollusca	Pisidium ponderosum	D3/1	2	2009-07-13	after the investment
Mollusca	Pisidium supinum	D3/1	1	2009-07-13	after the investment
Mollusca	Unio tumidus	D3/1	5	2009-07-13	after the investment
Mollusca	Planorbis carinatus	D3/1	1	2009-08-12	after the investment
Mollusca	Viviparus viviparus	D3/2	1	2009-05-22	after the investment
Mollusca	Gyraulus albus	D3/2		2009-05-22	after the investment
Mollusca	Pisidium amnicum	D3/2	2	2009-05-22	after the investment
Mollusca	Pisidium henslowanum	D3/2	1	2009-05-22	after the investment
Mollusca	Pisidium casertanum	D3/2	1	2009-05-22	after the investment
Mollusca	Galba truncatula	D3/2	29	2009-06-12	after the investment
Mollusca	Gyraulus albus	D3/2	1	2009-06-12	after the investment
Mollusca	Unio tumidus	D3/1	3	2009-06-12	after the investment
Mollusca	Unio crassus	D3/1	1	2009-06-12	after the investment
Mollusca	Galba truncatula	D3/2	1	2009-07-13	after the investment
Mollusca	Lymnaea stagnalis	D3/2	4	2009-08-12	after the investment
Mollusca	Radix balthica	D3/2	7	2009-08-12	after the investment
Mollusca	Gyraulus albus	D3/2	2	2009-08-12	after the investment
Mollusca	Gyraulus crista	D3/2	1	2009-08-12	after the investment
Mollusca	Sphaerium corneum	D3/2	2	2009-08-12	after the investment
Mollusca	Unio tumidus	D3/1	7	2009-08-12	after the investment
Mollusca	Succinea elegans	D3/2	1	2009-08-12	after the investment
Mollusca	Bithynia tentaculata	C2/1	1	2009-04-18	after the investment
Mollusca	Sphaerium corneum	C2/1	1	2009-04-18	after the investment
Mollusca	Pisidium amnicum	C2/1	1	2009-04-18	after the investment
Mollusca	Pisidium henslowanum	C2/1	1	2009-04-18	after the investment
Mollusca	Unio crassus	C2/1	5	2009-04-18	after the investment
Mollusca	Viviparus viviparus	C2/1	3	2009-05-22	after the investment
Mollusca	Viviparus sp., juv.	C2/1	1	2009-05-22	after the investment
Mollusca	Pisidium supinum	C2/1	2	2009-05-22	after the investment
Mollusca	Unio crassus	C2/1	8	2009-05-22	after the investment
Mollusca	Viviparus viviparus	C2/1	1	2009-06-12	after the investment
Mollusca	Cochlicopa lubricella	C2/1	1	2009-06-12	after the investment
Mollusca	Oxychilus sp., juv.	C2/1	1	2009-06-12	after the investment
Mollusca	Unio crassus	C2/1	6	2009-06-12	after the investment
Mollusca	Viviparus viviparus	C2/1	1	2008-07-12	before the investment
Mollusca	Theodoxus fluviatilis	C2/1	3	2008-07-12	before the investment
Mollusca	Sphaerium corneum	C2/1	11	2008-07-12	before the investment
Mollusca	Unio crassus	C2/1	4	2008-07-12	before the investment
Mollusca	Pisidium amnicum	C2/1	4	2009-08-12	after the investment
Mollusca	Unio crassus	C2/1	7	2009-08-12	after the investment
Mollusca	Lymnaea stagnalis	C2/2	1	2009-04-18	after the investment
Mollusca	Bithynia tentaculata	C2/2	1	2009-04-18	after the investment
Mollusca	Sphaerium corneum	C2/2	1	2009-04-18	after the investment
Mollusca	Galba truncatula	C2/2	2	2009-05-22	after the investment
Mollusca	Bithynia tentaculata	C2/2	2	2009-05-22	after the investment
Mollusca	Sphaerium corneum	C2/2	1	2009-05-22	after the investment
Mollusca	Succinea elegans	C2/2	1	2009-05-22	after the investment
Mollusca	Bithynia leachii	C2/2	1	2009-06-12	after the investment
Mollusca	Galba truncatula	C2/2	18	2009-06-12	after the investment
Mollusca	Lymnaea stagnalis	C2/2	1	2009-07-13	after the investment
Mollusca	Viviparus sp.	C2/2	2	2009-07-13	after the investment
Mollusca	Galba truncatula	C2/2	1	2009-07-13	after the investment
Mollusca	Radix sp., juv.	C2/2	7	2009-07-13	after the investment
Mollusca	Succinea elegans	C2/2	25	2009-07-13	after the investment
Mollusca	Helicidae, juv.	C2/2	3	2009-07-13	after the investment
Mollusca	Lymnaea stagnalis	C2/2	3	2009-08-12	after the investment
Mollusca	Bithynia tentaculata	C2/2	5	2009-08-12	after the investment
Mollusca	Potamopyrgus antipodarum	C2/2	1	2009-08-12	after the investment
Mollusca	Radix sp., juv.	C2/2	2	2009-08-12	after the investment
Mollusca	Gyraulus albus	C2/2	1	2009-08-12	after the investment
Mollusca	Anisus vortex	C2/2	1	2009-08-12	after the investment
Mollusca	Viviparus viviparus	C2/2	3	2009-08-12	after the investment
Mollusca	Succinea elegans	C2/2	2	2009-08-12	after the investment
Mollusca	Viviparus viviparus	D4/1	2	2009-04-18	after the investment
Mollusca	Radix ampla	D4/1	1	2009-05-22	after the investment
Mollusca	Lymnaea stagnalis	D4/1	1	2009-06-12	after the investment
Mollusca	Radix ampla	D4/1	1	2009-06-12	after the investment
Mollusca	Radix sp., juv.	D4/1	1	2009-06-12	after the investment
Mollusca	Galba truncatula	D4/1	4	2009-06-12	after the investment
Mollusca	Anisus vortex	D4/1	1	2009-06-12	after the investment
Mollusca	Viviparus viviparus	D4/1	1	2009-07-13	after the investment
Mollusca	Radix balthica	D4/1	2	2009-07-13	after the investment
Mollusca	Gyraulus laevis	D4/1	1	2009-07-13	after the investment
Mollusca	Planorbis planorbis	D4/1	2	2009-07-13	after the investment
Mollusca	Galba truncatula	D4/1	1	2009-07-13	after the investment
Mollusca	Lymnaea stagnalis	D4/1	1	2009-08-12	after the investment
Mollusca	Viviparus viviparus	D4/2	1	2009-06-12	after the investment
Mollusca	Lymnaea stagnalis	D4/2	3	2009-07-13	after the investment
Mollusca	Galba truncatula	D4/2	2	2009-07-13	after the investment
Mollusca	Radix sp., juv.	D4/2	2	2009-07-13	after the investment
Mollusca	Lymnaea stagnalis	D4/2	1	2008-07-12	before the investment
Mollusca	Viviparus viviparus	D4/2	3	2008-07-12	before the investment
Mollusca	Radix ampla	D4/2	2	2008-07-12	before the investment
Mollusca	Planorbis planorbis	D4/2	4	2008-07-12	before the investment
Mollusca	Viviparus viviparus	D4/2	1	2009-08-12	after the investment
Mollusca	Lymnaea stagnalis	D4/2	1	2009-08-12	after the investment
Mollusca	Radix sp., juv.	D4/2	3	2009-08-12	after the investment
Mollusca	Radix balthica	staw 1	67	2009-07-13	fish ponds
Mollusca	Physa fontinalis	staw 1	1	2009-07-13	fish ponds
Mollusca	Lymnaea stagnalis	staw 1	11	2009-07-13	fish ponds
Mollusca	Anisus vortex	staw 1	10	2009-07-13	fish ponds
Mollusca	Gyraulus laevis	staw 1	41	2009-07-13	fish ponds
Mollusca	Planorbis planorbis	staw 1	1	2009-07-13	fish ponds
Mollusca	Unio tumidus	staw 1	2	2009-07-13	fish ponds
Mollusca	Unio pictorum	staw 1	3	2009-07-13	fish ponds
Mollusca	Anodonta anatina	staw 1	1	2009-07-13	fish ponds
Mollusca	Lymnaea stagnalis	staw 2	7	2009-07-13	fish ponds
Mollusca	Gyraulus laevis	staw 2	7	2009-07-13	fish ponds
Mollusca	Anisus vortex	staw 2	6	2009-07-13	fish ponds
Mollusca	Planorbis planorbis	staw 2	1	2009-07-13	fish ponds
Mollusca	Radix balthica	staw 2	2	2009-07-13	fish ponds
Mollusca	Anodonta anatina	staw 2	3	2009-07-13	fish ponds
Mollusca	Lymnaea stagnalis	staw 3	2	2009-07-13	fish ponds
Mollusca	Planorbarius corneus	staw 3	3	2009-07-13	fish ponds
Mollusca	Planorbis planorbis	staw 3	2	2009-07-13	fish ponds
Mollusca	Bithynia tentaculata	staw 3		2009-07-13	fish ponds
Mollusca	Radix balthica	staw 3	1	2009-07-13	fish ponds
Mollusca	Anisus vortex	staw 3	60	2009-07-13	fish ponds
Mollusca	Unio tumidus	staw 3	3	2009-07-13	fish ponds
Mollusca	Gyraulus laevis	staw 4	24	2009-07-13	fish ponds
Mollusca	Anisus vortex	staw 4	19	2009-07-13	fish ponds
Mollusca	Lymnaea stagnalis	staw 4	9	2009-07-13	fish ponds
Mollusca	Bithynia tentaculata	staw 4	6	2009-07-13	fish ponds
Mollusca	Radix balthica	staw 4	14	2009-07-13	fish ponds
Mollusca	Planorbarius corneus	staw 4	1	2009-07-13	fish ponds
Mollusca	Unio pictorum	staw 4	2	2009-07-13	fish ponds
Mollusca	Anodonta anatina	staw 4	1	2009-07-13	fish ponds
Mollusca	Viviparus viviparus	D1/1	3	2009-07-13	after the investment
Mollusca	Lymnaea stagnalis	D1/1	1	2009-07-13	after the investment
Mollusca	Viviparus viviparus	C2/1	1	2009-07-13	after the investment
Mollusca	Theodoxus fluviatilis	C2/1	3	2009-07-13	after the investment
Mollusca	Sphaerium corneum	C2/1	11	2009-07-13	after the investment
Mollusca	Unio crassus	C2/1	3	2008-07-12	before the investment
Mollusca	Viviparus viviparus	D4/1	2	2009-04-18	after the investment
Mollusca	Planorbarius corneus	mały staw	2	2009-07-13	fish ponds
Mollusca	Gyraulus albus	mały staw	1	2009-07-13	fish ponds
Mollusca	Anodonta anatina	mały staw	1	2009-07-13	fish ponds
Mollusca	Theodoxus fluviatilis	C1/1	4	2008-07-12	before the investment
Mollusca	Bithynia tentaculata	C1/1	3	2008-07-12	before the investment
Mollusca	Pisidium amnicum	C1/1	2	2008-07-12	before the investment
Mollusca	Unio crassus	C1/1	1	2008-07-12	before the investment
Mollusca	Bithynia tentaculata	C1/2	10	2008-07-12	before the investment
Mollusca	Sphaerium corneum	C1/2	3	2008-07-12	before the investment
Mollusca	Anisus vortex	C1/2	16	2008-07-12	before the investment
Mollusca	Lymnaea stagnalis	C1/2	4	2008-07-12	before the investment
Mollusca	Radix balthica	D1/2	4	2008-07-12	before the investment
Mollusca	Lymnaea stagnalis	D1/2	3	2008-07-12	before the investment
Mollusca	Galba truncatula	D1/2	5	2008-07-12	before the investment
Mollusca	Planorbarius corneus	D1/2	6	2008-07-12	before the investment
Mollusca	Planorbis planorbis	D2/1	1	2008-07-12	before the investment
Mollusca	Pisidium amnicum	D2/1	1	2008-07-12	before the investment
Mollusca	Bithynia tentaculata	D2/1	7	2008-07-12	before the investment
Mollusca	Radix balthica	D2/1	2	2008-07-12	before the investment
Mollusca	Lymnaea stagnalis	D2/1	8	2008-07-12	before the investment
Mollusca	Gyraulus albus	D2/1	1	2008-07-12	before the investment
Mollusca	Anisus vortex	D2/1	3	2008-07-12	before the investment
Mollusca	Lymnaea stagnalis	D2/2	3	2008-07-12	before the investment
Mollusca	Galba truncatula	D2/2	4	2008-07-12	before the investment
Mollusca	Planorbarius corneus	D2/2	7	2008-07-12	before the investment
Mollusca	Planorbis planorbis	D2/2	5	2008-07-12	before the investment
Mollusca	Lymnaea stagnalis	C2/2	3	2008-07-12	before the investment
Mollusca	Viviparus sp.	C2/2	4	2008-07-12	before the investment
Mollusca	Galba truncatula	C2/2	2	2008-07-12	before the investment
Mollusca	Radix sp., juv.	C2/2	3	2009-07-13	after the investment
Mollusca	Planorbarius corneus	C2/2	2	2008-07-12	before the investment
Mollusca	Planorbis planorbis	C2/2	6	2008-07-12	before the investment
Mollusca	Segmentina nitida	D3/1	1	2008-07-12	before the investment
Mollusca	Planorbis planorbis	D3/1	3	2008-07-12	before the investment
Mollusca	Radix balthica	D3/1	2	2008-07-12	before the investment
Mollusca	Pisidium amnicum	D3/1	2	2008-07-12	before the investment
Mollusca	Unio tumidus	D3/1	5	2008-07-12	before the investment
Mollusca	Anodonta anatina	D3/1	2	2008-07-12	before the investment
Mollusca	Galba truncatula	D3/2	2	2008-07-12	before the investment
Mollusca	Lymnaea stagnalis	D3/2	5	2008-07-12	before the investment
Mollusca	Radix balthica	D3/2	4	2008-07-12	before the investment
Mollusca	Gyraulus albus	D3/2	4	2008-07-12	before the investment
Mollusca	Gyraulus crista	D3/2	1	2008-07-12	before the investment
Mollusca	Sphaerium corneum	D3/2	3	2008-07-12	before the investment
Hydrachnidia	Albia stationis	C2/2	7	2009-05-22	after the investment
Hydrachnidia	Albia stationis	C2/1	1	2009-05-22	after the investment
Hydrachnidia	Albia stationis	C1/1	1	2009-07-13	after the investment
Hydrachnidia	Albia stationis	C2/1	1	2008-07-12	before the investment
Hydrachnidia	Arrenurus albator	D1/2	1	2009-06-12	after the investment
Hydrachnidia	Arrenurus albator	D4/2	1	2009-06-12	after the investment
Hydrachnidia	Arrenurus albator	D3/1	1	2009-08-12	after the investment
Hydrachnidia	Arrenurus albator	D2/2	3	2009-08-12	after the investment
Hydrachnidia	Arrenurus albator	D2/2	2	2009-05-22	after the investment
Hydrachnidia	Arrenurus albator	D3/1	1	2009-07-13	after the investment
Hydrachnidia	Arrenurus batillifer	C1/2	4	2009-06-12	after the investment
Hydrachnidia	Arrenurus bruzelli	D4/1	2	2009-08-12	after the investment
Hydrachnidia	Arrenurus bruzelli	D4/1	1	2009-07-13	after the investment
Hydrachnidia	Arrenurus conicus	D3/2	1	2009-07-13	after the investment
Hydrachnidia	Arrenurus crassicaudatus	D3/1	1	2009-08-12	after the investment
Hydrachnidia	Arrenurus crassicaudatus	C1/1	1	2009-05-22	after the investment
Hydrachnidia	Arrenurus falciger	C1/2	1	2009-06-12	after the investment
Hydrachnidia	Arrenurus falciger	D3/2	1	2009-08-12	after the investment
Hydrachnidia	Arrenurus falciger	D4/1	1	2009-08-12	after the investment
Hydrachnidia	Arrenurus falciger	C1/2	2	2009-05-22	after the investment
Hydrachnidia	Arrenurus falciger	D2/2	1	2009-05-22	after the investment
Hydrachnidia	Arrenurus globator	D2/2	1	2009-06-12	after the investment
Hydrachnidia	Arrenurus globator	D4/1	3	2009-06-12	after the investment
Hydrachnidia	Arrenurus globator	C2/2	5	2009-08-12	after the investment
Hydrachnidia	Arrenurus globator	C2/2	1	2009-07-13	after the investment
Hydrachnidia	Arrenurus globator	D3/2	3	2009-07-13	after the investment
Hydrachnidia	Arrenurus globator	D4/1	2	2009-07-13	after the investment
Hydrachnidia	Arrenurus integrator	D3/2	1	2009-07-13	after the investment
Hydrachnidia	Arrenurus mediorotundatus	C1/2	1	2009-06-12	after the investment
Hydrachnidia	Arrenurus muelleri	D3/2	1	2009-07-13	after the investment
Hydrachnidia	Arrenurus sinuator	D2/2	1	2009-08-12	after the investment
Hydrachnidia	Arrenurus sinuator	D2/2	1	2009-05-22	after the investment
Hydrachnidia	Arrenurus sp.	C2/2	1	2009-07-13	after the investment
Hydrachnidia	Arrenurus tubulator	D2/2	1	2009-05-22	after the investment
Hydrachnidia	Arrenurus tubulator	D3/2	1	2009-07-13	after the investment
Hydrachnidia	Arrenurus tubulator	D4/1	4	2009-07-13	after the investment
Hydrachnidia	Atractides nodipalpis	D1/1	2	2009-08-12	after the investment
Hydrachnidia	Atractides nodipalpis	C1/1	2	2009-08-12	after the investment
Hydrachnidia	Atractides nodipalpis	D2/2	1	2009-08-12	after the investment
Hydrachnidia	Atractides nodipalpis	D4/1	1	2009-08-12	after the investment
Hydrachnidia	Atractides nodipalpis	D1/1	2	2009-07-13	after the investment
Hydrachnidia	Atractides nodipalpis	C1/1	4	2008-07-12	before the investment
Hydrachnidia	Brachypoda montii	C2/2	2	2009-05-22	after the investment
Hydrachnidia	Deutonimfy	C2/2	8	2009-06-12	after the investment
Hydrachnidia	Deutonimfy	D4/2	5	2009-06-12	after the investment
Hydrachnidia	Deutonimfy	D3/1	2	2009-06-12	after the investment
Hydrachnidia	Deutonimfy	D2/1	5	2009-06-12	after the investment
Hydrachnidia	Deutonimfy	D2/2	6	2009-06-12	after the investment
Hydrachnidia	Deutonimfy	D3/2	2	2009-06-12	after the investment
Hydrachnidia	Deutonimfy	D1/1	3	2009-08-12	after the investment
Hydrachnidia	Deutonimfy	D3/2	9	2009-08-12	after the investment
Hydrachnidia	Deutonimfy	C2/2	12	2009-08-12	after the investment
Hydrachnidia	Deutonimfy	C2/1	4	2009-08-12	after the investment
Hydrachnidia	Deutonimfy	D2/2	11	2009-08-12	after the investment
Hydrachnidia	Deutonimfy	D2/1	5	2009-08-12	after the investment
Hydrachnidia	Deutonimfy	D4/1	13	2009-08-12	after the investment
Hydrachnidia	Deutonimfy	D1/2	1	2009-04-18	after the investment
Hydrachnidia	Deutonimfy	D3/2	1	2009-05-22	after the investment
Hydrachnidia	Deutonimfy	C2/2	2	2009-05-22	after the investment
Hydrachnidia	Deutonimfy	D3/1	1	2009-04-18	after the investment
Hydrachnidia	Deutonimfy	C2/1	1	2009-05-22	after the investment
Hydrachnidia	Deutonimfy	D2/2	9	2009-05-22	after the investment
Hydrachnidia	Deutonimfy	D2/1	1	2009-04-18	after the investment
Hydrachnidia	Deutonimfy	D2/1	6	2009-05-22	after the investment
Hydrachnidia	Deutonimfy	D2/2	65	2009-07-13	after the investment
Hydrachnidia	Deutonimfy	D3/2	16	2009-07-13	after the investment
Hydrachnidia	Deutonimfy	D2/1	8	2009-07-13	after the investment
Hydrachnidia	Deutonimfy	D1/1	10	2009-07-13	after the investment
Hydrachnidia	Deutonimfy	C2/1	8	2009-07-13	after the investment
Hydrachnidia	Eylais discreta	D3/2	1	2008-07-12	before the investment
Hydrachnidia	Eylais extendens	C2/2	1	2009-06-12	after the investment
Hydrachnidia	Eylais extendens	C1/2	4	2009-06-12	after the investment
Hydrachnidia	Eylais extendens	D3/2	1	2009-08-12	after the investment
Hydrachnidia	Eylais extendens	C2/2	3	2009-07-13	after the investment
Hydrachnidia	Eylais extendens	D3/2	1	2009-07-13	after the investment
Hydrachnidia	Eylais extendens	D2/1	1	2009-08-12	after the investment
Hydrachnidia	Eylais mutila	C2/2	1	2008-07-12	before the investment
Hydrachnidia	Forelia variegator	C2/2	2	2009-06-12	after the investment
Hydrachnidia	Forelia variegator	C2/1	8	2009-06-12	after the investment
Hydrachnidia	Forelia variegator	D4/2	2	2009-06-12	after the investment
Hydrachnidia	Forelia variegator	D2/1	6	2009-06-12	after the investment
Hydrachnidia	Forelia variegator	D3/2	1	2009-06-12	after the investment
Hydrachnidia	Forelia variegator	D1/1	1	2009-08-12	after the investment
Hydrachnidia	Forelia variegator	D3/1	1	2009-08-12	after the investment
Hydrachnidia	Forelia variegator	C2/2	1	2009-08-12	after the investment
Hydrachnidia	Forelia variegator	D1/2	3	2009-08-12	after the investment
Hydrachnidia	Forelia variegator	D2/2	1	2009-08-12	after the investment
Hydrachnidia	Forelia variegator	D1/2	4	2009-04-18	after the investment
Hydrachnidia	Forelia variegator	D3/2	2	2009-05-22	after the investment
Hydrachnidia	Forelia variegator	D1/1	1	2009-04-18	after the investment
Hydrachnidia	Forelia variegator	C2/2	10	2009-05-22	after the investment
Hydrachnidia	Forelia variegator	D3/1	1	2009-04-18	after the investment
Hydrachnidia	Forelia variegator	D3/1	3	2009-05-22	after the investment
Hydrachnidia	Forelia variegator	D2/2	22	2009-05-22	after the investment
Hydrachnidia	Forelia variegator	C2/1	1	2009-04-18	after the investment
Hydrachnidia	Forelia variegator	D2/2	1	2009-04-18	after the investment
Hydrachnidia	Forelia variegator	D2/1	2	2009-04-18	after the investment
Hydrachnidia	Forelia variegator	D2/1	1	2009-05-22	after the investment
Hydrachnidia	Forelia variegator	D2/2	1	2009-07-13	after the investment
Hydrachnidia	Forelia variegator	D2/1	1	2009-07-13	after the investment
Hydrachnidia	Forelia variegator	D1/1	1	2009-07-13	after the investment
Hydrachnidia	Forelia variegator	D3/1	3	2009-07-13	after the investment
Hydrachnidia	Forelia variegator	C2/1	2	2009-07-13	after the investment
Hydrachnidia	Forelia variegator	D1/2	1	2008-07-12	before the investment
Hydrachnidia	Hydrachna cruenta	D3/2	1	2009-07-13	after the investment
Hydrachnidia	Hydrachna cruenta	D4/1	1	2009-07-13	after the investment
Hydrachnidia	Hydrachna globosa	C2/2	1	2009-06-12	after the investment
Hydrachnidia	Hydrachna globosa	D1/2	1	2009-06-12	after the investment
Hydrachnidia	Hydrachna globosa	D3/2	2	2009-06-12	after the investment
Hydrachnidia	Hydrachna globosa	C2/2	1	2009-08-12	after the investment
Hydrachnidia	Hydrachna globosa	D4/1	1	2009-08-12	after the investment
Hydrachnidia	Hydrachna globosa	D4/1	2	2009-05-22	after the investment
Hydrachnidia	Hydrachna globosa	C2/2	1	2009-07-13	after the investment
Hydrachnidia	Hydrachna globosa	D2/2	1	2009-07-13	after the investment
Hydrachnidia	Hydrachna globosa	D4/1	2	2009-07-13	after the investment
Hydrachnidia	Hydrochoreutes krameri	D3/2	1	2009-07-13	after the investment
Hydrachnidia	Hydrochoreutes sp.	C2/2	1	2008-07-12	before the investment
Hydrachnidia	Hydrochoreutes ungulatus	C2/2	1	2008-07-12	before the investment
Hydrachnidia	Hydrodroma despiciens	C1/2	2	2009-06-12	after the investment
Hydrachnidia	Hydrodroma despiciens	C1/2	1	2009-07-13	after the investment
Hydrachnidia	Hydrodroma despiciens	D4/1	1	2008-07-12	before the investment
Hydrachnidia	Hydrodroma pilosa	D3/2	1	2009-08-12	after the investment
Hydrachnidia	Hydrodroma pilosa	D4/1	4	2009-08-12	after the investment
Hydrachnidia	Hydrodroma pilosa	D4/1	3	2009-07-13	after the investment
Hydrachnidia	Hydryphantes dispar	D1/2	1	2009-07-13	after the investment
Hydrachnidia	Hygrobates fluviatilis	C1/1	2	2009-06-12	after the investment
Hydrachnidia	Hygrobates fluviatilis	D4/2	1	2009-06-12	after the investment
Hydrachnidia	Hygrobates fluviatilis	D3/2	3	2009-06-12	after the investment
Hydrachnidia	Hygrobates fluviatilis	D4/2	2	2009-06-12	after the investment
Hydrachnidia	Hygrobates fluviatilis	D1/1	15	2009-08-12	after the investment
Hydrachnidia	Hygrobates fluviatilis	C1/1	2	2009-08-12	after the investment
Hydrachnidia	Hygrobates fluviatilis	D1/2	4	2009-08-12	after the investment
Hydrachnidia	Hygrobates fluviatilis	C1/1	1	2009-05-22	after the investment
Hydrachnidia	Hygrobates fluviatilis	C2/2	1	2009-07-13	after the investment
Hydrachnidia	Hygrobates fluviatilis	C1/1	1	2009-07-13	after the investment
Hydrachnidia	Hygrobates fluviatilis	D4/2	3	2008-07-12	before the investment
Hydrachnidia	Hygrobates fluviatilis	C2/2	1	2008-07-12	before the investment
Hydrachnidia	Hygrobates fluviatilis	D3/2	1	2008-07-12	before the investment
Hydrachnidia	Hygrobates fluviatilis	C2/1	1	2008-07-12	before the investment
Hydrachnidia	Hygrobates fluviatilis	C1/1	4	2008-07-12	before the investment
Hydrachnidia	Hygrobates fluviatilis	C1/1	4	2008-07-12	before the investment
Hydrachnidia	Hygrobates foreli	C1/1	1	2009-07-13	after the investment
Hydrachnidia	Hygrobates longipalpis	D2/2	2	2009-06-12	after the investment
Hydrachnidia	Hygrobates longipalpis	D3/2	3	2009-06-12	after the investment
Hydrachnidia	Hygrobates longipalpis	D4/1	1	2009-06-12	after the investment
Hydrachnidia	Hygrobates longipalpis	D1/1	8	2009-08-12	after the investment
Hydrachnidia	Hygrobates longipalpis	D3/2	1	2009-08-12	after the investment
Hydrachnidia	Hygrobates longipalpis	D3/1	1	2009-08-12	after the investment
Hydrachnidia	Hygrobates longipalpis	C2/2	12	2009-08-12	after the investment
Hydrachnidia	Hygrobates longipalpis	C1/2	1	2009-08-12	after the investment
Hydrachnidia	Hygrobates longipalpis	D2/2	6	2009-08-12	after the investment
Hydrachnidia	Hygrobates longipalpis	D2/1	1	2009-08-12	after the investment
Hydrachnidia	Hygrobates longipalpis	D4/1	4	2009-08-12	after the investment
Hydrachnidia	Hygrobates longipalpis	D1/2	36	2009-04-18	after the investment
Hydrachnidia	Hygrobates longipalpis	D3/2	4	2009-05-22	after the investment
Hydrachnidia	Hygrobates longipalpis	D4/1	3	2009-05-22	after the investment
Hydrachnidia	Hygrobates longipalpis	C2/2	1	2009-05-22	after the investment
Hydrachnidia	Hygrobates longipalpis	D3/2	3	2009-04-18	after the investment
Hydrachnidia	Hygrobates longipalpis	D3/1	1	2009-05-22	after the investment
Hydrachnidia	Hygrobates longipalpis	D2/2	20	2009-05-22	after the investment
Hydrachnidia	Hygrobates longipalpis	C2/1	1	2009-04-18	after the investment
Hydrachnidia	Hygrobates longipalpis	C1/2	5	2009-05-22	after the investment
Hydrachnidia	Hygrobates longipalpis	D2/2	33	2009-04-18	after the investment
Hydrachnidia	Hygrobates longipalpis	D2/1	9	2009-04-18	after the investment
Hydrachnidia	Hygrobates longipalpis	D2/1	2	2009-04-18	after the investment
Hydrachnidia	Hygrobates longipalpis	D2/1	1	2009-05-22	after the investment
Hydrachnidia	Hygrobates longipalpis	D1/2	9	2009-07-13	after the investment
Hydrachnidia	Hygrobates longipalpis	C2/2	4	2009-07-13	after the investment
Hydrachnidia	Hygrobates longipalpis	D2/2	2	2009-07-13	after the investment
Hydrachnidia	Hygrobates longipalpis	D3/2	1	2009-07-13	after the investment
Hydrachnidia	Hygrobates longipalpis	C1/2	2	2009-07-13	after the investment
Hydrachnidia	Hygrobates longipalpis	D4/1	3	2009-07-13	after the investment
Hydrachnidia	Hygrobates longipalpis	C2/2	2	2008-07-12	before the investment
Hydrachnidia	Hygrobates longipalpis	D4/1	3	2008-07-12	before the investment
Hydrachnidia	Hygrobates longipalpis	D4/1	1	2008-07-12	before the investment
Hydrachnidia	Hygrobates longipalpis	D3/2	4	2008-07-12	before the investment
Hydrachnidia	Hygrobates longipalpis	C1/2	9	2008-07-12	before the investment
Hydrachnidia	Hygrobates longipalpis	C1/2	53	2008-07-12	before the investment
Hydrachnidia	Hygrobates setosus	C1/1	2	2009-06-12	after the investment
Hydrachnidia	Hygrobates setosus	D1/1	1	2009-06-12	after the investment
Hydrachnidia	Hygrobates setosus	D3/2	25	2009-06-12	after the investment
Hydrachnidia	Hygrobates setosus	D1/1	29	2009-08-12	after the investment
Hydrachnidia	Hygrobates setosus	D3/1	1	2009-08-12	after the investment
Hydrachnidia	Hygrobates setosus	C1/1	47	2009-08-12	after the investment
Hydrachnidia	Hygrobates setosus	D1/1	1	2009-04-18	after the investment
Hydrachnidia	Hygrobates setosus	D1/2	3	2009-05-22	after the investment
Hydrachnidia	Hygrobates setosus	D3/1	2	2009-04-18	after the investment
Hydrachnidia	Hygrobates setosus	C2/1	5	2009-04-18	after the investment
Hydrachnidia	Hygrobates setosus	D2/1	2	2009-04-18	after the investment
Hydrachnidia	Hygrobates setosus	D2/2	1	2009-07-13	after the investment
Hydrachnidia	Hygrobates setosus	C1/1	1	2009-07-13	after the investment
Hydrachnidia	Hygrobates setosus	C1/2	2	2009-07-13	after the investment
Hydrachnidia	Hygrobates setosus	D1/1	3	2009-07-13	after the investment
Hydrachnidia	Hygrobates setosus	C1/1	4	2008-07-12	before the investment
Hydrachnidia	Hygrobates setosus	D1/2	1	2008-07-12	before the investment
Hydrachnidia	Hygrobates setosus	D2/1	2	2009-08-12	after the investment
Hydrachnidia	Hygrobates sp.	D1/2	2	2009-07-13	after the investment
Hydrachnidia	Hygrobates sp.	C1/1	1	2008-07-12	before the investment
Hydrachnidia	Hygrobates sp.	D4/1	1	2008-07-12	before the investment
Hydrachnidia	Hygrobates sp.	C1/2	1	2008-07-12	before the investment
Hydrachnidia	Hygrobates sp.	C2/1	1	2008-07-12	before the investment
Hydrachnidia	Hygrobates trigonicus	C1/1	3	2009-06-12	after the investment
Hydrachnidia	Hygrobates trigonicus	D1/2	1	2009-06-12	after the investment
Hydrachnidia	Hygrobates trigonicus	C1/1	1	2009-08-12	after the investment
Hydrachnidia	Larwa	C2/2	1	2009-07-13	after the investment
Hydrachnidia	Lebertia fimbriata	D1/1	1	2009-08-12	after the investment
Hydrachnidia	Lebertia inaequalis	C2/2	5	2009-06-12	after the investment
Hydrachnidia	Lebertia inaequalis	D1/2	1	2009-06-12	after the investment
Hydrachnidia	Lebertia inaequalis	C2/1	2	2009-06-12	after the investment
Hydrachnidia	Lebertia inaequalis	D3/2	1	2009-06-12	after the investment
Hydrachnidia	Lebertia inaequalis	D4/2	4	2009-06-12	after the investment
Hydrachnidia	Lebertia inaequalis	D3/2	3	2009-08-12	after the investment
Hydrachnidia	Lebertia inaequalis	D3/1	2	2009-08-12	after the investment
Hydrachnidia	Lebertia inaequalis	C2/2	12	2009-08-12	after the investment
Hydrachnidia	Lebertia inaequalis	C1/1	5	2009-08-12	after the investment
Hydrachnidia	Lebertia inaequalis	C2/1	1	2009-08-12	after the investment
Hydrachnidia	Lebertia inaequalis	C2/2	11	2009-05-22	after the investment
Hydrachnidia	Lebertia inaequalis	D3/1	1	2009-05-22	after the investment
Hydrachnidia	Lebertia inaequalis	C2/1	6	2009-05-22	after the investment
Hydrachnidia	Lebertia inaequalis	C2/1	3	2009-04-18	after the investment
Hydrachnidia	Lebertia inaequalis	D2/1	1	2009-04-18	after the investment
Hydrachnidia	Lebertia inaequalis	D2/1	1	2009-05-22	after the investment
Hydrachnidia	Lebertia inaequalis	C2/2	5	2009-07-13	after the investment
Hydrachnidia	Lebertia inaequalis	C1/1	1	2009-07-13	after the investment
Hydrachnidia	Lebertia inaequalis	C1/2	2	2009-07-13	after the investment
Hydrachnidia	Lebertia inaequalis	C2/1	4	2009-07-13	after the investment
Hydrachnidia	Lebertia inaequalis	D3/2	1	2008-07-12	before the investment
Hydrachnidia	Lebertia inaequalis	C2/2	1	2008-07-12	before the investment
Hydrachnidia	Lebertia inaequalis	C2/1	29	2008-07-12	before the investment
Hydrachnidia	Lebertia insignis	C2/2	3	2009-06-12	after the investment
Hydrachnidia	Lebertia insignis	C1/1	2	2009-06-12	after the investment
Hydrachnidia	Lebertia insignis	C2/1	8	2009-06-12	after the investment
Hydrachnidia	Lebertia insignis	D4/2	38	2009-06-12	after the investment
Hydrachnidia	Lebertia insignis	D2/1	2	2009-06-12	after the investment
Hydrachnidia	Lebertia insignis	D3/2	1	2009-06-12	after the investment
Hydrachnidia	Lebertia insignis	D4/1	26	2009-06-12	after the investment
Hydrachnidia	Lebertia insignis	D4/2	1	2009-06-12	after the investment
Hydrachnidia	Lebertia insignis	D1/1	13	2009-08-12	after the investment
Hydrachnidia	Lebertia insignis	C1/1	5	2009-08-12	after the investment
Hydrachnidia	Lebertia insignis	D1/2	5	2009-08-12	after the investment
Hydrachnidia	Lebertia insignis	C2/1	2	2009-08-12	after the investment
Hydrachnidia	Lebertia insignis	D2/2	2	2009-08-12	after the investment
Hydrachnidia	Lebertia insignis	D4/1	6	2009-08-12	after the investment
Hydrachnidia	Lebertia insignis	D1/2	6	2009-04-18	after the investment
Hydrachnidia	Lebertia insignis	D3/2	1	2009-05-22	after the investment
Hydrachnidia	Lebertia insignis	D4/1	4	2009-05-22	after the investment
Hydrachnidia	Lebertia insignis	D1/1	6	2009-04-18	after the investment
Hydrachnidia	Lebertia insignis	D1/1	5	2009-05-22	after the investment
Hydrachnidia	Lebertia insignis	C1/1	8	2009-05-22	after the investment
Hydrachnidia	Lebertia insignis	D1/2	1	2009-05-22	after the investment
Hydrachnidia	Lebertia insignis	C2/2	4	2009-05-22	after the investment
Hydrachnidia	Lebertia insignis	D3/1	1	2009-04-18	after the investment
Hydrachnidia	Lebertia insignis	D3/1	14	2009-05-22	after the investment
Hydrachnidia	Lebertia insignis	C2/1	26	2009-05-22	after the investment
Hydrachnidia	Lebertia insignis	C2/1	1	2009-04-18	after the investment
Hydrachnidia	Lebertia insignis	D2/2	1	2009-04-18	after the investment
Hydrachnidia	Lebertia insignis	D2/1	12	2009-04-18	after the investment
Hydrachnidia	Lebertia insignis	D2/1	10	2009-05-22	after the investment
Hydrachnidia	Lebertia insignis	C1/1	1	2009-07-13	after the investment
Hydrachnidia	Lebertia insignis	D2/1	3	2009-07-13	after the investment
Hydrachnidia	Lebertia insignis	D4/2	2	2009-07-13	after the investment
Hydrachnidia	Lebertia insignis	D1/1	6	2009-07-13	after the investment
Hydrachnidia	Lebertia insignis	D4/1	4	2009-07-13	after the investment
Hydrachnidia	Lebertia insignis	D3/1	4	2009-07-13	after the investment
Hydrachnidia	Lebertia insignis	C2/1	4	2009-07-13	after the investment
Hydrachnidia	Lebertia insignis	D4/2	1	2008-07-12	before the investment
Hydrachnidia	Lebertia insignis	D3/2	2	2008-07-12	before the investment
Hydrachnidia	Lebertia insignis	C1/2	1	2008-07-12	before the investment
Hydrachnidia	Lebertia insignis	C2/1	3	2008-07-12	before the investment
Hydrachnidia	Lebertia insignis	C1/1	4	2008-07-12	before the investment
Hydrachnidia	Lebertia longiseta	D1/1	1	2009-06-12	after the investment
Hydrachnidia	Lebertia natans	D1/1	1	2009-08-12	after the investment
Hydrachnidia	Lebertia natans	D1/2	2	2009-08-12	after the investment
Hydrachnidia	Lebertia natans	D2/1	1	2009-08-12	after the investment
Hydrachnidia	Lebertia natans	D1/2	2	2009-04-18	after the investment
Hydrachnidia	Lebertia natans	D2/1	1	2009-04-18	after the investment
Hydrachnidia	Lebertia oblonga	D1/2	1	2009-06-12	after the investment
Hydrachnidia	Lebertia porosa	D1/2	8	2009-06-12	after the investment
Hydrachnidia	Lebertia porosa	C1/1	1	2009-08-12	after the investment
Hydrachnidia	Lebertia porosa	C1/1	8	2009-07-13	after the investment
Hydrachnidia	Lebertia porosa	D3/1	1	2009-05-22	after the investment
Hydrachnidia	Lebertia rivulorum	C1/1	1	2009-08-12	after the investment
Hydrachnidia	Lebertia rivulorum	C2/1	2	2008-07-12	before the investment
Hydrachnidia	Lebertia sp.	C2/1	2	2009-06-12	after the investment
Hydrachnidia	Lebertia sp.	D1/1	2	2009-08-12	after the investment
Hydrachnidia	Lebertia sp.	C1/1	1	2009-08-12	after the investment
Hydrachnidia	Lebertia sp.	C1/1	1	2009-05-22	after the investment
Hydrachnidia	Lebertia sp.	C1/1	2	2009-07-13	after the investment
Hydrachnidia	Lebertia sp.	D3/1	2	2009-07-13	after the investment
Hydrachnidia	Lebertia sp.	C2/1	2	2009-07-13	after the investment
Hydrachnidia	Lebertia sp.	C1/1	2	2008-07-12	before the investment
Hydrachnidia	Lebertia sp.	C2/1	3	2008-07-12	before the investment
Hydrachnidia	Lebertia sp.	C1/1	4	2008-07-12	before the investment
Hydrachnidia	Limnesia fulgida	C2/2	1	2009-07-13	after the investment
Hydrachnidia	Limnesia maculata	C2/2	36	2009-06-12	after the investment
Hydrachnidia	Limnesia maculata	C1/2	1	2009-06-12	after the investment
Hydrachnidia	Limnesia maculata	D1/2	1	2009-06-12	after the investment
Hydrachnidia	Limnesia maculata	D4/2	33	2009-06-12	after the investment
Hydrachnidia	Limnesia maculata	D3/1	3	2009-06-12	after the investment
Hydrachnidia	Limnesia maculata	D2/1	8	2009-06-12	after the investment
Hydrachnidia	Limnesia maculata	D2/2	76	2009-06-12	after the investment
Hydrachnidia	Limnesia maculata	D3/2	138	2009-06-12	after the investment
Hydrachnidia	Limnesia maculata	D4/1	419	2009-06-12	after the investment
Hydrachnidia	Limnesia maculata	D4/2	10	2009-06-12	after the investment
Hydrachnidia	Limnesia maculata	D3/2	43	2009-08-12	after the investment
Hydrachnidia	Limnesia maculata	D3/1	13	2009-08-12	after the investment
Hydrachnidia	Limnesia maculata	C2/2	63	2009-08-12	after the investment
Hydrachnidia	Limnesia maculata	C2/1	1	2009-08-12	after the investment
Hydrachnidia	Limnesia maculata	D2/2	16	2009-08-12	after the investment
Hydrachnidia	Limnesia maculata	D2/1	16	2009-08-12	after the investment
Hydrachnidia	Limnesia maculata	D4/1	57	2009-08-12	after the investment
Hydrachnidia	Limnesia maculata	D3/2	13	2009-05-22	after the investment
Hydrachnidia	Limnesia maculata	D4/1	96	2009-05-22	after the investment
Hydrachnidia	Limnesia maculata	C2/2	2	2009-05-22	after the investment
Hydrachnidia	Limnesia maculata	D3/1	5	2009-05-22	after the investment
Hydrachnidia	Limnesia maculata	C2/1	2	2009-05-22	after the investment
Hydrachnidia	Limnesia maculata	D2/2	15	2009-05-22	after the investment
Hydrachnidia	Limnesia maculata	D2/2	1	2009-04-18	after the investment
Hydrachnidia	Limnesia maculata	D2/1	2	2009-04-18	after the investment
Hydrachnidia	Limnesia maculata	D2/1	1	2009-05-22	after the investment
Hydrachnidia	Limnesia maculata	C2/2	33	2009-07-13	after the investment
Hydrachnidia	Limnesia maculata	D2/2	33	2009-07-13	after the investment
Hydrachnidia	Limnesia maculata	D3/2	54	2009-07-13	after the investment
Hydrachnidia	Limnesia maculata	D2/1	2	2009-07-13	after the investment
Hydrachnidia	Limnesia maculata	D4/2	3	2009-07-13	after the investment
Hydrachnidia	Limnesia maculata	D1/1	1	2009-07-13	after the investment
Hydrachnidia	Limnesia maculata	D4/1	62	2009-07-13	after the investment
Hydrachnidia	Limnesia maculata	D3/1	2	2009-07-13	after the investment
Hydrachnidia	Limnesia maculata	C2/1	4	2009-07-13	after the investment
Hydrachnidia	Limnesia maculata	D4/2	10	2008-07-12	before the investment
Hydrachnidia	Limnesia maculata	C2/2	6	2008-07-12	before the investment
Hydrachnidia	Limnesia maculata	D4/1	112	2008-07-12	before the investment
Hydrachnidia	Limnesia maculata	D3/2	55	2008-07-12	before the investment
Hydrachnidia	Limnesia maculata	C2/2	20	2008-07-12	before the investment
Hydrachnidia	Limnesia maculata	D1/2	4	2008-07-12	before the investment
Hydrachnidia	Limnesia maculata	C2/1	2	2008-07-12	before the investment
Hydrachnidia	Limnesia sp.	C2/1	3	2009-06-12	after the investment
Hydrachnidia	Limnesia sp.	D4/1	5	2009-06-12	after the investment
Hydrachnidia	Limnesia sp.	D4/2	1	2009-06-12	after the investment
Hydrachnidia	Limnesia sp.	D3/1	6	2009-08-12	after the investment
Hydrachnidia	Limnesia sp.	C2/2	20	2009-07-13	after the investment
Hydrachnidia	Limnesia sp.	D3/2	67	2009-07-13	after the investment
Hydrachnidia	Limnesia sp.	D4/2	2	2009-07-13	after the investment
Hydrachnidia	Limnesia sp.	D4/1	36	2009-07-13	after the investment
Hydrachnidia	Limnesia sp.	D4/2	4	2008-07-12	before the investment
Hydrachnidia	Limnesia sp.	D4/1	57	2008-07-12	before the investment
Hydrachnidia	Limnesia sp.	D3/2	32	2008-07-12	before the investment
Hydrachnidia	Limnesia sp.	C2/2	3	2008-07-12	before the investment
Hydrachnidia	Limnesia sp.	D1/2	13	2008-07-12	before the investment
Hydrachnidia	Limnesia sp.	C2/1	1	2008-07-12	before the investment
Hydrachnidia	Limnesia sp.	D2/1	1	2009-08-12	after the investment
Hydrachnidia	Limnesia undulata	D1/2	1	2009-04-18	after the investment
Hydrachnidia	Limnesia undulata	D4/1	1	2008-07-12	before the investment
Hydrachnidia	Limnesia undulatoides	C2/2	1	2009-06-12	after the investment
Hydrachnidia	Limnesia undulatoides	D3/1	1	2009-08-12	after the investment
Hydrachnidia	Limnesia undulatoides	C2/2	1	2009-05-22	after the investment
Hydrachnidia	Limnesia undulatoides	D2/2	1	2009-05-22	after the investment
Hydrachnidia	Limnesia undulatoides	D2/1	1	2009-05-22	after the investment
Hydrachnidia	Limnesia undulatoides	D3/2	2	2009-07-13	after the investment
Hydrachnidia	Limnesia undulatoides	D3/2	3	2008-07-12	before the investment
Hydrachnidia	Mideopsis crassipes	C1/1	2	2009-06-12	after the investment
Hydrachnidia	Mideopsis crassipes	C2/1	2	2009-06-12	after the investment
Hydrachnidia	Mideopsis crassipes	D4/2	1	2009-06-12	after the investment
Hydrachnidia	Mideopsis crassipes	D2/1	1	2009-06-12	after the investment
Hydrachnidia	Mideopsis crassipes	C2/2	3	2009-08-12	after the investment
Hydrachnidia	Mideopsis crassipes	C1/1	8	2009-08-12	after the investment
Hydrachnidia	Mideopsis crassipes	D1/2	2	2009-08-12	after the investment
Hydrachnidia	Mideopsis crassipes	D2/2	6	2009-08-12	after the investment
Hydrachnidia	Mideopsis crassipes	D1/1	1	2009-04-18	after the investment
Hydrachnidia	Mideopsis crassipes	C1/1	2	2009-05-22	after the investment
Hydrachnidia	Mideopsis crassipes	C2/2	19	2009-05-22	after the investment
Hydrachnidia	Mideopsis crassipes	D3/2	1	2009-04-18	after the investment
Hydrachnidia	Mideopsis crassipes	D3/1	1	2009-05-22	after the investment
Hydrachnidia	Mideopsis crassipes	C2/1	1	2009-04-18	after the investment
Hydrachnidia	Mideopsis crassipes	C1/2	7	2009-05-22	after the investment
Hydrachnidia	Mideopsis crassipes	D2/2	1	2009-04-18	after the investment
Hydrachnidia	Mideopsis crassipes	D2/1	4	2009-04-18	after the investment
Hydrachnidia	Mideopsis crassipes	D2/1	2	2009-05-22	after the investment
Hydrachnidia	Mideopsis crassipes	C1/1	2	2009-07-13	after the investment
Hydrachnidia	Mideopsis crassipes	C1/2	1	2009-07-13	after the investment
Hydrachnidia	Mideopsis crassipes	C2/1	1	2009-07-13	after the investment
Hydrachnidia	Mideopsis crassipes	C1/1	1	2008-07-12	before the investment
Hydrachnidia	Mideopsis crassipes	D3/2	1	2008-07-12	before the investment
Hydrachnidia	Mideopsis crassipes	C1/2	1	2008-07-12	before the investment
Hydrachnidia	Mideopsis crassipes	C2/1	3	2008-07-12	before the investment
Hydrachnidia	Mideopsis orbicularis	C2/2	10	2009-06-12	after the investment
Hydrachnidia	Mideopsis orbicularis	C1/1	5	2009-06-12	after the investment
Hydrachnidia	Mideopsis orbicularis	C1/2	6	2009-06-12	after the investment
Hydrachnidia	Mideopsis orbicularis	D1/2	2	2009-06-12	after the investment
Hydrachnidia	Mideopsis orbicularis	C2/1	12	2009-06-12	after the investment
Hydrachnidia	Mideopsis orbicularis	D4/2	3	2009-06-12	after the investment
Hydrachnidia	Mideopsis orbicularis	D3/1	9	2009-06-12	after the investment
Hydrachnidia	Mideopsis orbicularis	D2/2	1	2009-06-12	after the investment
Hydrachnidia	Mideopsis orbicularis	D4/2	3	2009-06-12	after the investment
Hydrachnidia	Mideopsis orbicularis	D1/1	4	2009-08-12	after the investment
Hydrachnidia	Mideopsis orbicularis	D3/2	1	2009-08-12	after the investment
Hydrachnidia	Mideopsis orbicularis	D3/1	6	2009-08-12	after the investment
Hydrachnidia	Mideopsis orbicularis	C2/2	21	2009-08-12	after the investment
Hydrachnidia	Mideopsis orbicularis	C1/1	13	2009-08-12	after the investment
Hydrachnidia	Mideopsis orbicularis	D1/2	8	2009-08-12	after the investment
Hydrachnidia	Mideopsis orbicularis	C2/1	1	2009-08-12	after the investment
Hydrachnidia	Mideopsis orbicularis	D2/2	20	2009-08-12	after the investment
Hydrachnidia	Mideopsis orbicularis	D2/1	1	2009-08-12	after the investment
Hydrachnidia	Mideopsis orbicularis	D4/1	4	2009-08-12	after the investment
Hydrachnidia	Mideopsis orbicularis	D1/2	10	2009-04-18	after the investment
Hydrachnidia	Mideopsis orbicularis	D3/2	6	2009-05-22	after the investment
Hydrachnidia	Mideopsis orbicularis	D4/1	2	2009-05-22	after the investment
Hydrachnidia	Mideopsis orbicularis	D1/1	2	2009-05-22	after the investment
Hydrachnidia	Mideopsis orbicularis	C1/1	7	2009-05-22	after the investment
Hydrachnidia	Mideopsis orbicularis	D4/1	1	2009-04-18	after the investment
Hydrachnidia	Mideopsis orbicularis	D4/1	4	2009-04-18	after the investment
Hydrachnidia	Mideopsis orbicularis	D1/2	1	2009-05-22	after the investment
Hydrachnidia	Mideopsis orbicularis	D1/2	3	2009-05-22	after the investment
Hydrachnidia	Mideopsis orbicularis	C2/2	144	2009-05-22	after the investment
Hydrachnidia	Mideopsis orbicularis	D3/2	3	2009-04-18	after the investment
Hydrachnidia	Mideopsis orbicularis	D3/1	1	2009-05-22	after the investment
Hydrachnidia	Mideopsis orbicularis	C2/1	8	2009-05-22	after the investment
Hydrachnidia	Mideopsis orbicularis	D2/2	14	2009-05-22	after the investment
Hydrachnidia	Mideopsis orbicularis	C2/1	1	2009-04-18	after the investment
Hydrachnidia	Mideopsis orbicularis	C2/2	4	2009-04-18	after the investment
Hydrachnidia	Mideopsis orbicularis	C1/2	25	2009-05-22	after the investment
Hydrachnidia	Mideopsis orbicularis	D2/2	31	2009-04-18	after the investment
Hydrachnidia	Mideopsis orbicularis	D2/1	7	2009-04-18	after the investment
Hydrachnidia	Mideopsis orbicularis	D2/1	13	2009-05-22	after the investment
Hydrachnidia	Mideopsis orbicularis	C2/2	2	2009-07-13	after the investment
Hydrachnidia	Mideopsis orbicularis	C1/1	4	2009-07-13	after the investment
Hydrachnidia	Mideopsis orbicularis	D3/2	2	2009-07-13	after the investment
Hydrachnidia	Mideopsis orbicularis	C1/2	2	2009-07-13	after the investment
Hydrachnidia	Mideopsis orbicularis	D2/1	2	2009-07-13	after the investment
Hydrachnidia	Mideopsis orbicularis	D4/2	1	2009-07-13	after the investment
Hydrachnidia	Mideopsis orbicularis	D3/1	3	2009-07-13	after the investment
Hydrachnidia	Mideopsis orbicularis	C2/1	20	2009-07-13	after the investment
Hydrachnidia	Mideopsis orbicularis	D4/2	2	2008-07-12	before the investment
Hydrachnidia	Mideopsis orbicularis	C2/1	1	2009-06-12	after the investment
Hydrachnidia	Nautarachna crassa	C2/1	1	2009-06-12	after the investment
Hydrachnidia	Nautarachna crassa	C2/2	2	2009-05-22	after the investment
Hydrachnidia	Neumania callosa	C2/2	1	2009-05-22	after the investment
Hydrachnidia	Neumania callosa	C2/1	1	2009-07-13	after the investment
Hydrachnidia	Neumania limosa	D3/1	1	2009-08-12	after the investment
Hydrachnidia	Neumania limosa	D2/2	1	2009-08-12	after the investment
Hydrachnidia	Neumania papillosa	C2/1	7	2009-06-12	after the investment
Hydrachnidia	Neumania papillosa	D4/1	1	2009-06-12	after the investment
Hydrachnidia	Neumania papillosa	C2/2	1	2009-08-12	after the investment
Hydrachnidia	Neumania papillosa	D4/1	1	2009-08-12	after the investment
Hydrachnidia	Neumania papillosa	C2/2	17	2009-05-22	after the investment
Hydrachnidia	Neumania papillosa	D2/1	1	2009-04-18	after the investment
Hydrachnidia	Neumania papillosa	C2/1	4	2009-07-13	after the investment
Hydrachnidia	Piona alpicola	C2/2	1	2009-07-13	after the investment
Hydrachnidia	Piona alpicola	D3/2	10	2009-07-13	after the investment
Hydrachnidia	Piona alpicola	C1/2	1	2009-07-13	after the investment
Hydrachnidia	Piona carnea	D3/2	8	2009-07-13	after the investment
Hydrachnidia	Piona coccinea	C2/2	2	2009-06-12	after the investment
Hydrachnidia	Piona coccinea	C2/1	1	2009-06-12	after the investment
Hydrachnidia	Piona coccinea	D3/1	4	2009-06-12	after the investment
Hydrachnidia	Piona coccinea	D2/1	6	2009-06-12	after the investment
Hydrachnidia	Piona coccinea	D2/2	9	2009-06-12	after the investment
Hydrachnidia	Piona coccinea	D3/2	8	2009-06-12	after the investment
Hydrachnidia	Piona coccinea	D4/1	1	2009-06-12	after the investment
Hydrachnidia	Piona coccinea	C2/2	3	2009-07-13	after the investment
Hydrachnidia	Piona coccinea	D2/2	3	2009-07-13	after the investment
Hydrachnidia	Piona coccinea	C2/1	1	2009-07-13	after the investment
Hydrachnidia	Tiphys bullatus	MS	1	2009-07-13	fish ponds
Hydrachnidia	Arrenurus globator	MS	3	2009-07-13	fish ponds
Hydrachnidia	Arrenurus fimbriatus	MS	1	2009-07-13	fish ponds
Hydrachnidia	Pionidae	MS	2	2009-07-13	fish ponds
Hydrachnidia	Piona nodata	DS3	8	2009-07-13	fish ponds
Hydrachnidia	Piona variabilis	DS3	12	2009-07-13	fish ponds
Hydrachnidia	Piona neumani	DS3	1	2009-07-13	fish ponds
Hydrachnidia	Pionidae	DS3	34	2009-07-13	fish ponds
Hydrachnidia	Limnesia maculata	DS4	16	2009-07-13	fish ponds
Hydrachnidia	Limnesia undulatoides	DS4	30	2009-07-13	fish ponds
Hydrachnidia	Hydrodroma pilosa	DS4	1	2009-07-13	fish ponds
Hydrachnidia	Piona coccinea	DS4	2	2009-07-13	fish ponds
Hydrachnidia	Piona neumani	DS4	1	2009-07-13	fish ponds
Hydrachnidia	Piona conglobata	DS4	2	2009-07-13	fish ponds
Hydrachnidia	Arrenurus perforatus	DS4	1	2009-07-13	fish ponds
Hydrachnidia	Limnesia sp.	DS4	5	2009-07-13	fish ponds
Hydrachnidia	Piona sp.	DS4	5	2009-07-13	fish ponds
Hydrachnidia	Hydrochoreutes ungulatus	DS2	2	2009-07-13	fish ponds
Hydrachnidia	Piona carnea	DS2	19	2009-07-13	fish ponds
Hydrachnidia	Piona variabilis	DS2	31	2009-07-13	fish ponds
Hydrachnidia	Piona coccinea	DS2	1	2009-07-13	fish ponds
Hydrachnidia	Piona pusilla	DS2	1	2009-07-13	fish ponds
Hydrachnidia	Limnesia maculata	DS2	1	2009-07-13	fish ponds
Hydrachnidia	Limnesia undulatoides	DS2	1	2009-07-13	fish ponds
Hydrachnidia	Eylais extendens	DS2	1	2009-07-13	fish ponds
Hydrachnidia	Hydrachna conjecta	DS2	1	2009-07-13	fish ponds
Hydrachnidia	Limnesia sp.	DS2	2	2009-07-13	fish ponds
Hydrachnidia	Pionidae	DS2	9	2009-07-13	fish ponds
Hydrachnidia	Hydrachna skorikowi	DS1	2	2009-07-13	fish ponds
Hydrachnidia	Piona carnea	DS1	53	2009-07-13	fish ponds
Hydrachnidia	Pionopsis lutescens	DS1	1	2009-07-13	fish ponds
Hydrachnidia	Limnesia maculata	DS1	6	2009-07-13	fish ponds
Hydrachnidia	Limnesia undulatoides	DS1	14	2009-07-13	fish ponds
Hydrachnidia	Hydrodroma pilosa	DS1	1	2009-07-13	fish ponds
Hydrachnidia	Arrenurus globator	DS1	4	2009-07-13	fish ponds
Hydrachnidia	Arrenurus maculator	DS1	1	2009-07-13	fish ponds
Hydrachnidia	Arrenurus affinis	DS1	1	2009-07-13	fish ponds
Hydrachnidia	Arrenurus knauthei	DS1	1	2009-07-13	fish ponds
Hydrachnidia	Piona imminuta	DS1	2	2009-07-13	fish ponds
Hydrachnidia	Piona coccinea	DS1	7	2009-07-13	fish ponds
Hydrachnidia	Piona variabilis	DS1	45	2009-07-13	fish ponds
Hydrachnidia	Piona pusilla	DS1	2	2009-07-13	fish ponds
Hydrachnidia	Piona nodata	DS1	2	2009-07-13	fish ponds
Hydrachnidia	Piona conglobata	DS1	2	2009-07-13	fish ponds
Hydrachnidia	Pionidae	DS1	21	2009-07-13	fish ponds
Hydrachnidia	Limnesia sp.	DS1	16	2009-07-13	fish ponds
Hydrachnidia	Arrenurus sp.	DS1	3	2009-07-13	fish ponds
Hydrachnidia	Piona coccinea	D3/2	1	2008-07-12	before the investment
Hydrachnidia	Piona coccinea	C2/2	1	2008-07-12	before the investment
Hydrachnidia	Piona conglobata	D4/2	1	2009-06-12	after the investment
Hydrachnidia	Piona conglobata	D3/2	1	2009-07-13	after the investment
Hydrachnidia	Piona dispersa	D4/1	2	2009-06-12	after the investment
Hydrachnidia	Piona imminuta	D3/1	3	2009-07-13	after the investment
Hydrachnidia	Limnesia maculata	C2/1A	2	2008-07-12	before the investment
Hydrachnidia	Hygrobates fluviatilis	C2/1A	3	2008-07-12	before the investment
Hydrachnidia	Torrenticola amplexa	C2/1A	2	2008-07-12	before the investment
Hydrachnidia	Lebertia insignis	C2/1A	9	2008-07-12	before the investment
Hydrachnidia	Lebertia inaequalis	C2/1A	2	2008-07-12	before the investment
Hydrachnidia	Lebertia sp.	C2/1A	2	2008-07-12	before the investment
Hydrachnidia	Piona longipalpis	D4/1	2	2009-08-12	after the investment
Hydrachnidia	Piona neumani	C2/2	1	2009-07-13	after the investment
Hydrachnidia	Piona neumani	D3/2	2	2009-07-13	after the investment
Hydrachnidia	Piona neumani	D2/1	1	2009-07-13	after the investment
Hydrachnidia	Piona neumani	D4/2	1	2008-07-12	before the investment
Hydrachnidia	Piona neumani	D4/1	3	2008-07-12	before the investment
Hydrachnidia	Piona paucipora	D3/1	1	2009-06-12	after the investment
Hydrachnidia	Piona paucipora	D3/2	1	2009-06-12	after the investment
Hydrachnidia	Piona paucipora	D4/1	1	2009-06-12	after the investment
Hydrachnidia	Piona paucipora	C2/2	1	2009-08-12	after the investment
Hydrachnidia	Piona paucipora	C2/2	2	2009-07-13	after the investment
Hydrachnidia	Piona paucipora	D2/2	5	2009-07-13	after the investment
Hydrachnidia	Piona paucipora	D3/2	9	2009-07-13	after the investment
Hydrachnidia	Piona pusilla	C2/1	1	2009-06-12	after the investment
Hydrachnidia	Piona pusilla	D4/2	2	2009-06-12	after the investment
Hydrachnidia	Piona pusilla	D3/1	3	2009-06-12	after the investment
Hydrachnidia	Piona pusilla	D2/1	14	2009-06-12	after the investment
Hydrachnidia	Piona pusilla	D2/2	32	2009-06-12	after the investment
Hydrachnidia	Piona pusilla	D3/2	7	2009-06-12	after the investment
Hydrachnidia	Piona pusilla	D4/1	5	2009-06-12	after the investment
Hydrachnidia	Piona pusilla	D1/1	1	2009-08-12	after the investment
Hydrachnidia	Piona pusilla	D3/2	1	2009-08-12	after the investment
Hydrachnidia	Piona pusilla	D4/1	1	2009-05-22	after the investment
Hydrachnidia	Piona pusilla	D2/2	21	2009-07-13	after the investment
Hydrachnidia	Piona pusilla	D3/2	2	2009-07-13	after the investment
Hydrachnidia	Piona pusilla	D2/1	1	2009-07-13	after the investment
Hydrachnidia	Piona pusilla	D4/1	7	2009-07-13	after the investment
Hydrachnidia	Piona pusilla	D4/1	3	2008-07-12	before the investment
Hydrachnidia	Piona pusilla	C2/2	2	2008-07-12	before the investment
Hydrachnidia	Piona rotundoides	D3/2	2	2008-07-12	before the investment
Hydrachnidia	Piona sp.	C2/1	9	2009-06-12	after the investment
Hydrachnidia	Piona sp.	D3/2	1	2009-07-13	after the investment
Hydrachnidia	Piona sp.	D3/1	1	2009-07-13	after the investment
Hydrachnidia	Piona sp.	C2/2	3	2008-07-12	before the investment
Hydrachnidia	Piona sp.	D4/1	2	2008-07-12	before the investment
Hydrachnidia	Piona variabilis	C1/2	1	2009-06-12	after the investment
Hydrachnidia	Piona variabilis	D4/1	1	2009-08-12	after the investment
Hydrachnidia	Piona variabilis	D2/2	1	2009-07-13	after the investment
Hydrachnidia	Piona variabilis	D3/2	4	2009-07-13	after the investment
Hydrachnidia	Piona variabilis	D4/1	2	2008-07-12	before the investment
Hydrachnidia	Piona variabilis	C2/2	2	2008-07-12	before the investment
Hydrachnidia	Piona variabilis	D2/1	2	2009-08-12	after the investment
Hydrachnidia	Pionopsis lutescens	C2/2	1	2009-06-12	after the investment
Hydrachnidia	Sperchon clupeifer	C1/1	1	2009-08-12	after the investment
Hydrachnidia	Sperchon clupeifer	D1/2	1	2009-08-12	after the investment
Hydrachnidia	Sperchon clupeifer	D1/1	6	2009-05-22	after the investment
Hydrachnidia	Sperchon clupeifer	C2/2	1	2009-05-22	after the investment
Hydrachnidia	Sperchon clupeifer	C2/1	2	2009-05-22	after the investment
Hydrachnidia	Sperchon clupeifer	C1/1	1	2009-07-13	after the investment
Hydrachnidia	Sperchon clupeifer	D1/1	2	2009-07-13	after the investment
Hydrachnidia	Sperchon clupeifer	C1/1	6	2008-07-12	before the investment
Hydrachnidia	Teutonia cometes	D3/1	1	2009-08-12	after the investment
Hydrachnidia	Torrenticola amplexa	C1/1	1	2009-06-12	after the investment
Hydrachnidia	Torrenticola amplexa	C1/1	1	2009-06-12	after the investment
Hydrachnidia	Torrenticola amplexa	C2/2	1	2009-08-12	after the investment
Hydrachnidia	Torrenticola amplexa	C1/1	15	2009-08-12	after the investment
Hydrachnidia	Torrenticola amplexa	D4/1	2	2009-08-12	after the investment
Hydrachnidia	Torrenticola amplexa	D4/1	2	2009-05-22	after the investment
Hydrachnidia	Torrenticola amplexa	D1/1	1	2009-05-22	after the investment
Hydrachnidia	Torrenticola amplexa	C1/1	5	2009-05-22	after the investment
Hydrachnidia	Torrenticola amplexa	C2/2	1	2009-05-22	after the investment
Hydrachnidia	Torrenticola amplexa	D3/1	1	2009-04-18	after the investment
Hydrachnidia	Torrenticola amplexa	C2/1	10	2009-05-22	after the investment
Hydrachnidia	Torrenticola amplexa	C2/1	1	2009-04-18	after the investment
Hydrachnidia	Torrenticola amplexa	C2/2	1	2009-04-18	after the investment
Hydrachnidia	Torrenticola amplexa	D2/1	1	2009-04-18	after the investment
Hydrachnidia	Torrenticola amplexa	C1/1	1	2009-07-13	after the investment
Hydrachnidia	Torrenticola amplexa	C2/2	1	2008-07-12	before the investment
Hydrachnidia	Torrenticola amplexa	C2/1	3	2008-07-12	before the investment
Hydrachnidia	Torrenticola amplexa	C2/1	3	2008-07-12	before the investment
Hydrachnidia	Torrenticola amplexa	C1/1	2	2008-07-12	before the investment
Hydrachnidia	Torrenticola dudichi	C2/1	1	2008-07-12	before the investment
Hydrachnidia	Unionicola aculeata	D1/1	2	2009-06-12	after the investment
Hydrachnidia	Unionicola aculeata	C2/2	1	2009-05-22	after the investment
Hydrachnidia	Unionicola aculeata	D2/2	5	2009-05-22	after the investment
Hydrachnidia	Unionicola aculeata	D1/2	6	2008-07-12	before the investment
Hydrachnidia	Unionicola crassipes	D4/1	1	2008-07-12	before the investment
Hydrachnidia	Unionicola crassipes	C1/2	2	2008-07-12	before the investment
Hydrachnidia	Unionicola gracilipalpis	D4/1	1	2009-07-13	after the investment
Hydrachnidia		D2/2	1	2009-05-22	after the investment
Heteroptera	Gerris lacustris	C1/2	3	2008-07-12	before the investment
Heteroptera	Sigara striata	C1/2	2	2008-07-12	before the investment
Heteroptera	Hesperocorixa sahlbergi	C1/2	3	2008-07-12	before the investment
Heteroptera	Hydrometra stagnorum	C1/2	1	2008-07-12	before the investment
Heteroptera	Sigara striata	C1/1	1	2008-07-12	before the investment
Heteroptera	Gerris rufoscutellatus	C1/2	2	2008-07-12	before the investment
Heteroptera	Nepa cinerea	C1/2	2	2008-07-12	before the investment
Heteroptera	Sigara falleni	C1/2	1	2008-07-12	before the investment
Heteroptera	Sigara distincta	C1/2	1	2008-07-12	before the investment
Heteroptera	Plea minutissima	C1/2	2	2008-07-12	before the investment
Heteroptera	Mesovelia furcata	C1/2	1	2008-07-12	before the investment
Heteroptera	Aphelocheirus aestivalis	C1/1	5	2008-07-12	before the investment
Heteroptera	Aquarius najas	C1/1	11	2008-07-12	before the investment
Heteroptera	Sigara falleni	D1/1	3	2008-07-12	before the investment
Heteroptera	Sigara striata	D1/1	4	2008-07-12	before the investment
Heteroptera	Gerris lacustris	D1/1	1	2008-07-12	before the investment
Heteroptera	Corixinae larvae	D1/1	3	2008-07-12	before the investment
Heteroptera	Microvelia umbricola	D1/2	1	2008-07-12	before the investment
Heteroptera	Hesperocorixa sahlbergi	D1/2	1	2008-07-12	before the investment
Heteroptera	Notonecta glauca	D1/2	1	2008-07-12	before the investment
Heteroptera	Gerris rufoscutellatus	D2/1	1	2008-07-12	before the investment
Heteroptera	Nepa cinerea	D2/1	1	2008-07-12	before the investment
Heteroptera	Notonecta glauca	D2/2	7	2008-07-12	before the investment
Heteroptera	Plea minutissima	D2/2	4	2008-07-12	before the investment
Heteroptera	Nepa cinerea	D2/2	1	2008-07-12	before the investment
Heteroptera	Hesperocorixa sahlbergi	D2/2	2	2008-07-12	before the investment
Heteroptera	Gerris lacustris	D2/2	2	2008-07-12	before the investment
Heteroptera	Cymatia coleoptrata	D2/2	1	2008-07-12	before the investment
Heteroptera	Corixinae larvae	D2/2	1	2008-07-12	before the investment
Heteroptera	Gerris lacustris	D3/1	11	2008-07-12	before the investment
Heteroptera	Sigara striata	D3/1	1	2008-07-12	before the investment
Heteroptera	Plea minutissima	D3/2	1	2008-07-12	before the investment
Heteroptera	Nepa cinerea	D3/2	2	2008-07-12	before the investment
Heteroptera	Gerris lacustris	D3/2	1	2008-07-12	before the investment
Heteroptera	Hydrometra stagnorum	D3/2	3	2008-07-12	before the investment
Heteroptera	Corixinae larvae	D3/2	1	2008-07-12	before the investment
Heteroptera	Aphelocheirus aestivalis	C2/1	2	2008-07-12	before the investment
Heteroptera	Gerris argentatus	C2/1	6	2008-07-12	before the investment
Heteroptera	Aquarius najas	C2/1	8	2008-07-12	before the investment
Heteroptera	Ilyocoris cimicoides	C2/2	1	2008-07-12	before the investment
Heteroptera	Nepa cinerea	C2/2	1	2008-07-12	before the investment
Heteroptera	Aquarius najas	C2/2	2	2008-07-12	before the investment
Heteroptera	Gerris rufoscutellatus	C2/2	1	2008-07-12	before the investment
Heteroptera	Corixinae larvae	C2/2	3	2008-07-12	before the investment
Heteroptera	Hydrometra stagnorum	D4/1	10	2008-07-12	before the investment
Heteroptera	Hesperocorixa linnaei	D4/1	1	2008-07-12	before the investment
Heteroptera	Sigara striata	D4/1	1	2008-07-12	before the investment
Heteroptera	Sigara striata	D4/2	11	2008-07-12	before the investment
Heteroptera	Corixinae larvae	D4/2	4	2008-07-12	before the investment
Heteroptera	Ilyocoris cimicoides	D4/2	1	2008-07-12	before the investment
Heteroptera	Sigara falleni	D4/2	3	2008-07-12	before the investment
Heteroptera	Gerris lacustris	D4/2	5	2008-07-12	before the investment
Heteroptera	Ilyocoris cimicoides	D3/2	2	2009-06-12	after the investment
Heteroptera	Plea minutissima	D3/2	5	2009-06-12	after the investment
Heteroptera	Sigara striata	D3/2	2	2009-06-12	after the investment
Heteroptera	Gerris lacustris	D3/2	5	2009-06-12	after the investment
Heteroptera	Ilyocoris cimicoides	C2/2	2	2009-06-12	after the investment
Heteroptera	Hydrometra stagnorum	C2/2	1	2009-06-12	after the investment
Heteroptera	Plea minutissima	D4/2	1	2009-06-12	after the investment
Heteroptera	Gerris lacustris	D4/2	1	2009-06-12	after the investment
Heteroptera	Aquarius najas	C2/1	1	2009-06-12	after the investment
Heteroptera	Gerris lacustris	C2/1	1	2009-06-12	after the investment
Heteroptera	Gerris argentatus	C2/1	1	2009-06-12	after the investment
Heteroptera	Ilyocoris cimicoides	D2/2	3	2009-06-12	after the investment
Heteroptera	Plea minutissima	D2/2	1	2009-06-12	after the investment
Heteroptera	Aphelocheirus aestivalis	D4/1	3	2009-06-12	after the investment
Heteroptera	Gerris lacustris	D4/1	1	2009-06-12	after the investment
Heteroptera	Plea minutissima	D4/1	4	2009-06-12	after the investment
Heteroptera	Callicorixa praeusta	D4/1	1	2009-06-12	after the investment
Heteroptera	Sigara striata	D4/1	2	2009-06-12	after the investment
Heteroptera	Notonecta glauca	C1/2	1	2009-06-12	after the investment
Heteroptera	Hydrometra stagnorum	C1/2	1	2009-06-12	after the investment
Heteroptera	Gerris lacustris	C1/1	1	2009-07-13	after the investment
Heteroptera	Aquarius najas	D3/2	36	2009-07-13	after the investment
Heteroptera	Plea minutissima	D3/2	2	2009-07-13	after the investment
Heteroptera	Notonecta sp.	D3/2	1	2009-07-13	after the investment
Heteroptera	Ilyocoris cimicoides	D3/2	1	2009-07-13	after the investment
Heteroptera	Sigara striata	D3/2	1	2009-07-13	after the investment
Heteroptera	Hydrometra stagnorum	D3/2	8	2009-07-13	after the investment
Heteroptera	Nepa cinerea	D4/1	1	2009-05-22	after the investment
Heteroptera	Ilyocoris cimicoides	D4/1	2	2009-05-22	after the investment
Heteroptera	Plea minutissima	D4/1	9	2009-05-22	after the investment
Heteroptera	Gerris lacustris	D4/1	1	2009-05-22	after the investment
Heteroptera	Hydrometra stagnorum	D4/1	10	2009-05-22	after the investment
Heteroptera	Nepa cinerea	C2/2	1	2009-07-13	after the investment
Heteroptera	Ilyocoris cimicoides	C2/2	2	2009-07-13	after the investment
Heteroptera	Hydrometra stagnorum	C2/2	1	2009-07-13	after the investment
Heteroptera	Notonecta glauca	D3/2	1	2009-05-22	after the investment
Heteroptera	Notonecta sp.	D1/2	2	2009-07-13	after the investment
Heteroptera	Hydrometra stagnorum	D1/2	4	2009-07-13	after the investment
Heteroptera	Gerris lacustris	D1/2	9	2009-07-13	after the investment
Heteroptera	Callicorixa praeusta	D1/2	2	2009-07-13	after the investment
Heteroptera	Sigara falleni lub S. distincta	D1/2	1	2009-07-13	after the investment
Heteroptera	Ranatra linearis	C1/2	1	2009-08-12	after the investment
Heteroptera	Notonecta glauca	C1/2	4	2009-08-12	after the investment
Heteroptera	Hesperocorixa sahlbergi	C1/2	1	2009-08-12	after the investment
Heteroptera	Hesperocorixa linnaei	C1/2	1	2009-08-12	after the investment
Heteroptera	Ilyocoris cimicoides	C2/2	3	2009-05-22	after the investment
Heteroptera	Nepa cinerea	C2/2	1	2009-05-22	after the investment
Heteroptera	Plea minutissima	C2/2	2	2009-05-22	after the investment
Heteroptera	Hydrometra stagnorum	C2/2	1	2009-05-22	after the investment
Heteroptera	Aquarius najas	C2/2	2	2009-05-22	after the investment
Heteroptera	Gerris lacustris	C2/2	2	2009-05-22	after the investment
Heteroptera	Notonecta glauca	D2/2	3	2009-07-13	after the investment
Heteroptera	Hydrometra stagnorum	D2/2	6	2009-07-13	after the investment
Heteroptera	Sigara striata	D2/2	2	2009-07-13	after the investment
Heteroptera	Aquarius najas	D2/2	8	2009-07-13	after the investment
Heteroptera	Nepa cinerea	D1/2	2	2009-06-12	after the investment
Heteroptera	Hydrometra stagnorum	D1/2	23	2009-06-12	after the investment
Heteroptera	Notonecta glauca	D1/2	4	2009-06-12	after the investment
Heteroptera	Sigara falleni	D1/2	3	2009-06-12	after the investment
Heteroptera	Sigara striata	D1/2	4	2009-06-12	after the investment
Heteroptera	Plea minutissima	C1/2	2	2009-05-22	after the investment
Heteroptera	Hesperocorixa sahlbergi	C1/2	2	2009-05-22	after the investment
Heteroptera	Aquarius najas	C2/1	2	2009-07-13	after the investment
Heteroptera	Plea minutissima	D3/2	1	2009-04-18	after the investment
Heteroptera	Gerris lacustris	D2/2	1	2009-05-22	after the investment
Heteroptera	Plea minutissima	D2/2	2	2009-05-22	after the investment
Heteroptera	Sigara striata	D4/2	2	2009-07-13	after the investment
Heteroptera	Plea minutissima	D1/2	2	2009-05-22	after the investment
Heteroptera	Plea minutissima	D3/2	1	2009-08-12	after the investment
Heteroptera	Hydrometra stagnorum	D3/2	7	2009-08-12	after the investment
Heteroptera	Ranatra linearis	D3/2	1	2009-08-12	after the investment
Heteroptera	Sigara striata	D3/2	3	2009-08-12	after the investment
Heteroptera	Sigara falleni	D3/2	2	2009-08-12	after the investment
Heteroptera	Sigara sp.	D3/2	1	2009-08-12	after the investment
Heteroptera	Gerris lacustris	D3/2	4	2009-08-12	after the investment
Heteroptera	Sigara falleni	D4/1	3	2009-04-18	after the investment
Heteroptera	Ilyocoris cimicoides	D1/2	1	2009-08-12	after the investment
Heteroptera	Notonecta sp.	D1/2	1	2009-08-12	after the investment
Heteroptera	Gerris lacustris	D1/2	2	2009-08-12	after the investment
Heteroptera	Sigara falleni	D1/2	4	2009-08-12	after the investment
Heteroptera	Sigara striata	D1/2	2	2009-08-12	after the investment
Heteroptera	Callicorixa praeusta	D1/2	1	2009-08-12	after the investment
Heteroptera	Sigara falleni lub S. distincta	D1/2	1	2009-08-12	after the investment
Heteroptera	Ranatra linearis	D4/1	1	2009-07-13	after the investment
Heteroptera	Hydrometra stagnorum	D4/1	1	2009-07-13	after the investment
Heteroptera	Ilyocoris cimicoides	D4/1	1	2009-07-13	after the investment
Heteroptera	Nepa cinerea	D4/1	1	2009-07-13	after the investment
Heteroptera	Plea minutissima	D4/1	19	2009-07-13	after the investment
Heteroptera	Sigara falleni	D4/1	1	2009-07-13	after the investment
Heteroptera	Sigara striata	D4/1	1	2009-07-13	after the investment
Heteroptera	Sigara striata	D1/1	4	2009-08-12	after the investment
Heteroptera	Sigara falleni	D1/1	3	2009-08-12	after the investment
Heteroptera	Sigara falleni lub S. distincta	D1/1	3	2009-08-12	after the investment
Heteroptera	Aquarius najas	C2/1	1	2009-04-18	after the investment
Heteroptera	Gerris lacustris	D4/1	1	2009-08-12	after the investment
Heteroptera	Nepa cinerea	D4/1	1	2009-08-12	after the investment
Heteroptera	Plea minutissima	D4/1	7	2009-08-12	after the investment
Heteroptera	Ilyocoris cimicoides	D4/1	3	2009-08-12	after the investment
Heteroptera	Sigara striata	D4/1	13	2009-08-12	after the investment
Heteroptera	Sigara falleni	D4/1	10	2009-08-12	after the investment
Heteroptera	Hesperocorixa sahlbergi	D4/1	3	2009-08-12	after the investment
Heteroptera	Hesperocorixa linnaei	D4/1	1	2009-08-12	after the investment
Heteroptera	Sigara falleni lub S. distincta	D4/1	1	2009-08-12	after the investment
Heteroptera	Cymatia coleoptrata	D4/1	2	2009-08-12	after the investment
Heteroptera	Nepa cinerea	D4/2	1	2009-08-12	after the investment
Heteroptera	Sigara striata	D4/2	2	2009-08-12	after the investment
Heteroptera	Sigara falleni	D4/2	1	2009-08-12	after the investment
Heteroptera	Sigara falleni lub S. distincta	D4/2	1	2009-08-12	after the investment
Heteroptera	Ilyocoris cimicoides	D2/1	1	2009-08-12	after the investment
Heteroptera	Gerris lacustris	C2/1	1	2009-05-22	after the investment
Heteroptera	Ilyocoris cimicoides	C2/1	1	2009-05-22	after the investment
Heteroptera	Ilyocoris cimicoides	D2/2	1	2009-04-18	after the investment
Heteroptera	Plea minutissima	D1/2	1	2009-04-18	after the investment
Heteroptera	Ilyocoris cimicoides	C2/2	1	2009-04-18	after the investment
Heteroptera	Nepa cinerea	C2/2	1	2009-04-18	after the investment
Heteroptera	Gerris lacustris	C2/2	7	2009-04-18	after the investment
Heteroptera	Aquarius najas	C2/2	9	2009-04-18	after the investment
Heteroptera	Aquarius najas	C1/1	4	2009-04-18	after the investment
Heteroptera	Aphelocheirus aestivalis	C1/1	1	2009-04-18	after the investment
Heteroptera	Sigara striata	C1/1	1	2009-04-18	after the investment
Heteroptera	Gerris lacustris	C1/2	4	2009-04-18	after the investment
Heteroptera	Aquarius najas	C1/2	1	2009-04-18	after the investment
Heteroptera	Gerris odontogaster	C1/2	1	2009-04-18	after the investment
Heteroptera	Gerris argentatus	C1/2	3	2009-04-18	after the investment
Heteroptera	Gerris rufoscutellatus	C1/2	1	2009-04-18	after the investment
Heteroptera	Sigara falleni	C1/2	1	2009-04-18	after the investment
Heteroptera	Ilyocoris cimicoides	MS	7	2009-07-13	fish ponds
Heteroptera	Plea minutissima	MS	1	2009-07-13	fish ponds
Heteroptera	Notonecta glauca	MS	3	2009-07-13	fish ponds
Heteroptera	Nepa cinerea	DS1	5	2009-07-13	fish ponds
Heteroptera	Notonecta glauca	DS1	1	2009-07-13	fish ponds
Heteroptera	Plea minutissima	DS1	28	2009-07-13	fish ponds
Heteroptera	Paracorixa concinna	DS2	18	2009-07-13	fish ponds
Heteroptera	Gerris odontogaster	DS2	9	2009-07-13	fish ponds
Heteroptera	Ilyocoris cimicoides	DS3	4	2009-07-13	fish ponds
Heteroptera	Notonecta glauca	DS3	2	2009-07-13	fish ponds
Heteroptera	Ilyocoris cimicoides	DS4	11	2009-07-13	fish ponds
Heteroptera	Notonecta glauca	DS4	1	2009-07-13	fish ponds
Heteroptera	Plea minutissima	DS4	6	2009-07-13	fish ponds
Heteroptera	Paracorixa concinna	DS4	55	2009-07-13	fish ponds
Heteroptera	Gerris lacustris	DS4	2	2009-07-13	fish ponds
Heteroptera	Aquarius najas	C2/1	1	2009-08-12	after the investment
Heteroptera	Gerris lacustris	C2/1	2	2009-08-12	after the investment
Heteroptera	Aphelocheirus aestivalis	C2/1	2	2009-08-12	after the investment
Heteroptera	Ranatra linearis	C2/2	2	2009-08-12	after the investment
Heteroptera	Gerris lacustris	C2/2	2	2009-08-12	after the investment
Heteroptera	Hydrometra stagnorum	C2/2	2	2009-08-12	after the investment
Heteroptera	Nepa cinerea	C2/2	3	2009-08-12	after the investment
Heteroptera	Aquarius najas	C2/2	1	2009-08-12	after the investment
Heteroptera	Gerris lacustris	C2/1	1	2009-07-13	after the investment
Heteroptera	Aphelocheirus aestivalis	C2/1	1	2009-07-13	after the investment
Odonata	1.1. Calopteryx virgo	D1/1	2	2008-07-12	before the investment
Odonata	6.1. Gomphus vulgatissimus	D1/1	1	2008-07-12	before the investment
Odonata	6.1. Gomphus vulgatissimus	D1/1	1	2009-04-18	after the investment
Odonata	6.1. Gomphus vulgatissimus	D1/1	1	2009-04-18	after the investment
Odonata	1.1. Calopteryx virgo	D1/1	1	2009-05-22	after the investment
Odonata	6.1. Gomphus vulgatissimus	D1/1	1	2009-05-22	after the investment
Odonata	1.1. Calopteryx virgo	D1/1	1	2009-08-12	after the investment
Odonata	4.1. Ischnura elegans	D3/1	1	2008-07-12	before the investment
Odonata	4.5. Erythromma najas	D3/1	1	2008-07-12	before the investment
Odonata	9.4. Sympetrum vulgatum	D3/1	1	2008-07-12	before the investment
Odonata	4.1. Ischnura elegans	D3/1	1	2009-08-12	after the investment
Odonata	4.5. Erythromma najas	D3/1	1	2009-08-12	after the investment
Odonata	6.1. Gomphus vulgatissimus	C2/1	2	2008-07-12	before the investment
Odonata	6.1. Gomphus vulgatissimus	C2/1	1	2009-08-12	after the investment
Odonata	1.1. Calopteryx virgo	D4/2	1	2009-08-12	after the investment
Odonata	1.1. Calopteryx splendens	D1/2	1	2008-07-12	before the investment
Odonata	1.1. Calopteryx virgo	D1/2	1	2008-07-12	before the investment
Odonata	6.1. Gomphus vulgatissimus	D1/2	1	2008-07-12	before the investment
Odonata	6.1. Gomphus vulgatissimus	D1/2	2	2009-05-22	after the investment
Odonata	1.1. Calopteryx splendens	D2/2	2	2008-07-12	before the investment
Odonata	1.1. Calopteryx splendens	D2/2	2	2009-04-18	after the investment
Odonata	1.1. Calopteryx virgo	D2/2	1	2009-08-12	after the investment
Odonata	4.1. Ischnura elegans	D3/2	2	2008-07-12	before the investment
Odonata	9.4. Sympetrum vulgatum	D3/2	1	2008-07-12	before the investment
Odonata	9.4. Sympetrum vulgatum	D3/2	1	2009-07-13	after the investment
Odonata	3.1. Platycnemis pennipes	D3/2	1	2009-08-12	after the investment
Odonata	4.1. Ischnura elegans	D3/2	2	2009-08-12	after the investment
Odonata	5.2. Aeshna cyanea	D3/2	1	2009-08-12	after the investment
Odonata	3.1. Platycnemis pennipes	C2/2	1	2008-07-12	before the investment
Odonata	4.1. Ischnura elegans	C2/2	4	2008-07-12	before the investment
Odonata	1.1. Calopteryx virgo	C2/2	7	2009-08-12	after the investment
Odonata	3.1. Platycnemis pennipes	C2/2	2	2009-08-12	after the investment
Odonata	4.1. Ischnura elegans	C2/2	2	2009-08-12	after the investment
Odonata	1.1. Calopteryx splendens	D4/1	2	2008-07-12	before the investment
Odonata	4.1. Ischnura elegans	D4/1	3	2008-07-12	before the investment
Odonata	4.1. Ischnura elegans	D4/1	1	2009-08-12	after the investment
Odonata	8.2. Somatochlora metallica	D4/1	1	2009-08-12	after the investment
Odonata	5.2. Aeshna mixta	DS1	1	2009-07-13	fish ponds
Odonata	2.3. Sympecma paedisca	DS2	2	2009-07-13	fish ponds
Odonata	2.3. Sympecma paedisca	DS2	2	2009-07-13	fish ponds
Odonata	2.1. Lestes sponsa	MS	2	2009-07-13	fish ponds
Odonata	2.3. Sympecma paedisca	MS	1	2009-07-13	fish ponds
Odonata	5.2. Aeshna mixta	MS	2	2009-07-13	fish ponds
Odonata	9.4. Sympetrum depressiusculum	MS	78	2009-07-13	fish ponds
Odonata	9.4. Sympetrum sanguineum	MS	1	2009-07-13	fish ponds
Odonata	9.4. Sympetrum vulgatum	MS	3	2009-07-13	fish ponds
Odonata	1.1. Calopteryx splendens	D4/1	1	2009-05-22	after the investment
Odonata	1.1. Calopteryx splendens	C1/2	3	2008-07-12	before the investment
Odonata	3.1. Platycnemis pennipes	C1/2	2	2008-07-12	before the investment
Odonata	4.1. Ischnura elegans	C1/2	1	2008-07-12	before the investment
Odonata	1.1. Calopteryx splendens	C1/2	1	2009-05-22	after the investment
Odonata	3.1. Platycnemis pennipes	C1/2	1	2009-05-22	after the investment
Odonata	4.1. Ischnura elegans	C1/2	2	2009-05-22	after the investment
Odonata	5.2. Aeshna mixta	C1/2	2	2009-08-12	after the investment
Odonata	1.1. Calopteryx splendens	C2/2	1	2008-07-12	before the investment
Odonata	1.1. Calopteryx splendens	C2/2	1	2009-04-18	after the investment

## Sheet: parameters
		flow	dredging	sand	silt	mud	plants
04D1-1	D1/1	0.18	5	1.5	1	0.5	0
04D1-2	D1/2	0.01	5	0	1.5	1.5	0
04D2-1	D2/1	0.05	5	0	2.5	0.5	0
04D2-2	D2/2	0.002	5	0	1.5	1.5	0
04D3-1	D3/1	0.05	5	1	1	1	0
04D3-2	D3/2	0.002	5	0	1.5	1.5	0
04C2-1	C2/1	0.2	0	3	0	0	0
04C2-2	C2/2	0.003	0	1	1	1	1
04D4-1	D4/1	0.001	5	0	0	3	0
05C1-1	C1/1	0.51	0	1	1	1	0
05C1-2	C1/2	0.02	0	0	0	3	2
05D1-1	D1/1	0.16	4	3	0	0	0.5
05-D1-2	D1/2	0.01	4	1	1	1	0
05D2-1	D2/1	0.04	4	0	1.5	1.5	0
05D2-2	D2/2	0.002	4	0	1.5	1.5	0.5
05D3-1	D3/1	0.05	4	1	1	1	0
05D3-2	D3/2	0.002	4	0	1.5	1.5	1
05C2-1	C2/1	0.15	0	2.5	0	0.5	0
05C2-2	C2/2	0.003	0	1	1	1	2
05D4-1	D4/1	0.001	4	0	0	3	0.5
06C1-1	C1/1	0.5	0	1	1	1	0
06C1-2	C1/2	0.02	0	0	0	3	3
06-D1-1	D1/1	0.12	3	3	0	0	1
06-D1-2	D1/2	0.01	3	0	1	2	1
06D2-1	D2/1	0.04	3	0	1.5	1.5	0.5
06D2-2	D2/2	0.002	3	0	1	2	1.5
06D3-1	D3/1	0.04	3	2	1	0	0.5
06D3-2	D3/2	0.002	3	1	1	1	1.5
06C2-1	C2/1	0.12	0	3	0	0	0
06C2-2	C2/2	0.003	0	1	1	1	3
06D4-1	D4/1	0.001	3	0	0	3	1.5
06D4-2	D4/2	0.06	3	0	0	3	2
07C1-1	C1/1	0.5	0	3	0	0	0
07C1-2	C1/2	0.01	0	0	0	3	3
07D1-1	D1/1	0.013	2	3	0	0	1
07D1-2	D1/2	0.01	2	0	1.5	1.5	2
07D1-2	D2/1	0.04	2	0	1.5	1.5	0.5
07D2-2	D2/2	0.002	2	0	1	2	3
07D3-1	D3/1	0.05	2	1.5	1.5	0	1
07D3-2	D3/2	0.002	2	1	1	1	3
07D3-2	C2/1	0.14	0	3	0	0	0
07C2-1	C2/2	0.003	0	1	1	1	3
07D4-1	D4/1	0.001	2	0	0	3	3
07D4-2	D4/2	0.04	2	0	0	3	2
08C1-1	C1/1	0.46	0	3	0	0	0
08C1-2	C1/2	0.002	0	0	0	3	3
08D1-1	D1/1	0.09	1	3	0	0	1
08D1-2	D1/2	0.002	1	0	1.5	1.5	2
08D2-1	D2/1	0.01	1	0	1.5	1.5	0.5
08D2-2	D2/2	0.001	1	0	1	2	3
08D3-1	D3/1	0.02	1	1.5	1.5	0	1
08D3-2	D3/2	0.001	1	1	1	1	3
08C2-1	C2/1	0.09	0	3	0	0	0
07C2-2	C2/2	0.001	0	1	1	1	3
08D4-1	D4/1	0.001	1	0	0	3	3
08D4-2	D4/2	0.03	1	0	0	3	2
